# Supplementary material for: Ferrocenyl-derived electrophilic phosphonium cations (EPCs) as Lewis acid catalysts
Source: Royal Society of Chemistry journal article supplement (doi:10.1039/c6dt00105j), 2016-01-01
Supplement: c6dt00105j1.pdf [file c6dt00105j1.pdf]

## **Supporting Information**

### **Ferrocenyl-derived Electrophilic Phosponium Cations (EPCs) as Lewis Acid Catalysts**

I. Mallov and D. W. Stephan

**This PDF file includes:**

|           |                                                                                                                     |           |
|-----------|---------------------------------------------------------------------------------------------------------------------|-----------|
| <b>1.</b> | <b>Materials and Methods</b>                                                                                        | <b>3</b>  |
| <b>2.</b> | <b>Synthesis of Catalysts and Precursors</b>                                                                        | <b>5</b>  |
| 2.1       | Synthesis of $\text{CpFe}(\eta^5\text{-C}_5\text{H}_4\text{PF}_2\text{Ph}_2)$ <b>1</b>                              | 5         |
| 2.2       | Synthesis of $\text{Fe}(\eta^5\text{-C}_5\text{H}_4\text{PF}_2\text{Ph}_2)_2$ <b>2</b>                              | 7         |
| 2.3       | Synthesis of $[\text{CpFe}(\eta^5\text{-C}_5\text{H}_4\text{PFPh}_2)][\text{B}(\text{C}_6\text{F}_5)_4]$ <b>3</b>   | 9         |
| 2.4       | Synthesis of $[\text{Fe}(\eta^5\text{-C}_5\text{H}_4\text{PFPh}_2)_2] 2[\text{B}(\text{C}_6\text{F}_5)_4]$ <b>4</b> | 11        |
| 2.5       | Synthesis of $[\text{PhMeP}(\eta^5\text{-C}_5\text{H}_4)_2\text{Fe}][\text{B}(\text{C}_6\text{F}_5)_4]$ <b>7</b>    | 12        |
| 2.6       | Cyclic Voltammogram of <b>3</b>                                                                                     | 15        |
| <b>3.</b> | <b>Lewis Acid Catalysis</b>                                                                                         | <b>16</b> |
| 3.1       | Dehydrocoupling of Phenol and Triethylsilane                                                                        | 16        |
| 3.2       | Friedel-Crafts Dimerization of 1,1-diphenylethylene                                                                 | 17        |
| 3.3       | Hydrodefluorination of 1-fluoropentane                                                                              | 19        |
| 3.4       | Hydrodeoxygenation Catalysis                                                                                        | 19        |
| 3.4.1     | General Procedure for Ketone Hydrodeoxygenation                                                                     | 19        |
| 3.4.2     | Ethylbenzene                                                                                                        | 20        |
| 3.4.3     | 1-Benzyl-4-fluorobenzene                                                                                            | 21        |
| 3.4.4     | 1-Benzyl-4-bromobenzene                                                                                             | 22        |
| 3.4.5     | 1,2-Bis(4-methoxyphenyl)ethane                                                                                      | 23        |
| 3.4.6     | 1-Benzyl-4-methoxybenzene                                                                                           | 24        |
| 3.4.7     | Isopentane                                                                                                          | 25        |
| 3.4.8     | Diphenylmethane                                                                                                     | 26        |
| 3.4.9     | Phenylcyclohexylmethane                                                                                             | 27        |
| 3.4.10    | 1-Benzyl-4-methoxybenzene                                                                                           | 28        |
| 3.4.11    | 1-Ethyl-2,4,6-triisopropylbenzene                                                                                   | 29        |
| 3.5       | Hydrosilylation of 2,2,2-trifluoroacetophenone                                                                      | 30        |
| <b>4.</b> | <b>References</b>                                                                                                   | <b>31</b> |

## 1. Materials and Methods

### *General Remarks*

All preparations and manipulations were carried out under an anhydrous N<sub>2</sub> atmosphere using standard Schlenk and glovebox techniques. All glassware was oven-dried and cooled under vacuum before use. Commercially available reagents such as dppf, XeF<sub>2</sub>, Et<sub>3</sub>SiH, 1-fluoropentane, 1,1'-diphenylethylene, and ketones were purchased from Sigma Aldrich, Strem or Apollo Scientific and used without further purification unless indicated otherwise. (C<sub>5</sub>H<sub>5</sub>)Fe(C<sub>5</sub>H<sub>4</sub>)PPh<sub>2</sub><sup>[S1]</sup> and PhP(η<sup>5</sup>-C<sub>5</sub>H<sub>4</sub>)<sub>2</sub>Fe<sup>[S2]</sup> was prepared according to literature procedures. CH<sub>2</sub>Cl<sub>2</sub>, *n*-pentane, and toluene were dried using an Innovative Technologies solvent purification system. CD<sub>2</sub>Cl<sub>2</sub> (Aldrich) was deoxygenated, distilled over CaH<sub>2</sub>, then stored over 4 Å molecular sieves before use. Reactions were monitored using NMR spectroscopy. NMR spectra were obtained on a Bruker AvanceIII-400 MHz spectrometer and a Varian Agilent DD2 500 MHz spectrometer. Data for <sup>1</sup>H NMR spectroscopy is reported as follows: chemical shift (δ ppm), multiplicity (s = singlet, d = doublet, t = triplet, q = quartet, quin = quintet, m = multiplet, dm = doublet of multiplets, b = broad), coupling constant (Hz), integration. Data for <sup>13</sup>C NMR is reported in terms of chemical shift (δ / ppm). High-resolution mass spectra (HRMS) were obtained on a micro mass 70S-250 spectrometer (EI), an ABI/Sciex QStar Mass Spectrometer (DART), or on a JOEL AccuTOF-DART (DART). Mass spectrometry experiments were run for isolated products and reaction mixtures, however in some cases the high fragmentation of compounds or volatility did not allow for mass peak identification.

### *X-ray Diffraction Studies.*

Single crystals were coated with Paratone-N oil, mounted using a glass fibre pin and frozen in a cold nitrogen stream on the goniometer. Data sets were collected on a Siemens Smart System CCD diffractometer which was equipped with a rotation anode using graphite-monochromated MoK $\alpha$  radiation ( $\lambda = 0.71073$  Å). Data reduction was performed using the SAINT software package and an absorption correction was applied using SADABS. The structures were solved by direct methods using XS and refined by full-matrix least squares on F<sup>2</sup> using XL as implemented in the

SHELXTL suite of programs. All non-hydrogen atoms were refined anisotropically. Carbon-bound hydrogen atoms were placed in calculated positions using an appropriate riding model and coupled isotropic temperature factors.

## 2. Synthesis of Catalysts and Precursors

### 2.1

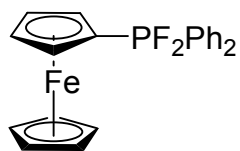

#### Synthesis of **CpFe(η<sup>5</sup>-C<sub>5</sub>H<sub>4</sub>PF<sub>2</sub>Ph<sub>2</sub>) 1**

A solution of XeF<sub>2</sub> (34 mg, 0.20 mmol) in CH<sub>2</sub>Cl<sub>2</sub> (1 mL) was added dropwise to a solution of phenylphosphinoferrocene (74 mg, 0.20 mmol) in CH<sub>2</sub>Cl<sub>2</sub> (1 mL). Effervescence was immediately observed. After stirring 2 h volatiles were removed *in vacuo* resulting in a dull orange solid in quantitative yield (81 mg). X-ray quality crystals were obtained by cooling a saturated solution of the product in CH<sub>2</sub>Cl<sub>2</sub> to -35 °C. <sup>1</sup>H NMR (CD<sub>2</sub>Cl<sub>2</sub>, [ppm]): 3.94 (s, 5H, Cp), 4.50 (s, 2H, Cp CH<sub>β</sub>), 4.83 (2H, s, Cp CH<sub>α</sub>), 7.44-7.50 (m, 6H, *p*-Ph, *m*-Ph), 7.96-8.08 (m, 4H, *o*-Ph) <sup>13</sup>C {<sup>1</sup>H} NMR (CD<sub>2</sub>Cl<sub>2</sub>, [ppm]): 70.2 (Cp C<sub>β</sub>), 72.8 (d, Cp C<sub>α</sub>, <sup>2</sup>J<sub>PC</sub> = 15 Hz), 76.0 (br m, Cp C<sub>ipso</sub>), 128.9 (d, Ph, C<sub>α</sub>, <sup>2</sup>J<sub>PC</sub> = 17 Hz), 131.8 (s, Ph, C<sub>β</sub>) 134.2 (m). Resonances for *ipso*-carbon atoms on phenyl, Cp moieties were not observed. <sup>19</sup>F {<sup>1</sup>H} NMR (CD<sub>2</sub>Cl<sub>2</sub>, [ppm]): -42.7 (d, <sup>1</sup>J<sub>PF</sub> = 656 Hz) <sup>31</sup>P {<sup>1</sup>H} NMR (CD<sub>2</sub>Cl<sub>2</sub>, [ppm]): -50.1 (t, <sup>1</sup>J<sub>PF</sub> = 656 Hz); Elemental Analysis for C<sub>22</sub>H<sub>19</sub>F<sub>2</sub>P: calcd.: C 64.7, H 4.7, found: C 63.1, H 4.9; HRMS (ESI-QTOF+): m/z 387.0596 ([CpFe(η<sup>5</sup>-C<sub>5</sub>H<sub>4</sub>POPPh<sub>2</sub>)] (calc.: 387.0601)

Note: Repeated attempts to obtain satisfactory elemental analysis of **1** led consistently to low C values. This is attributed to incomplete combustion, presumably a result of the formation of metal-carbide.

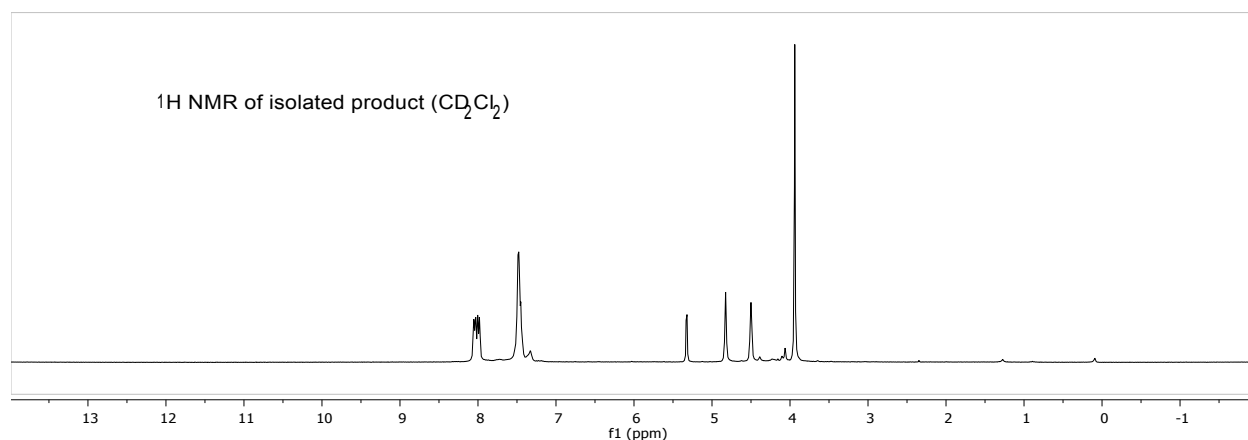

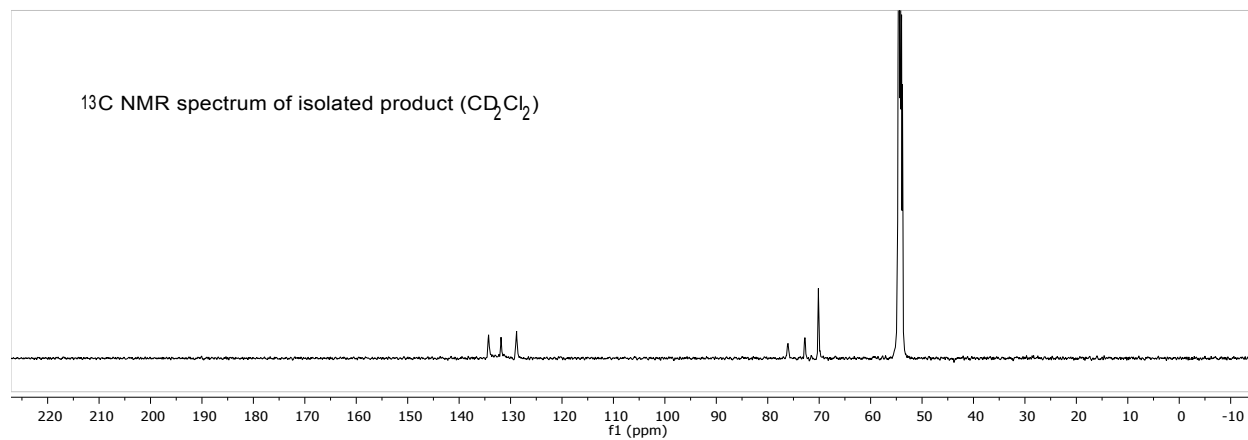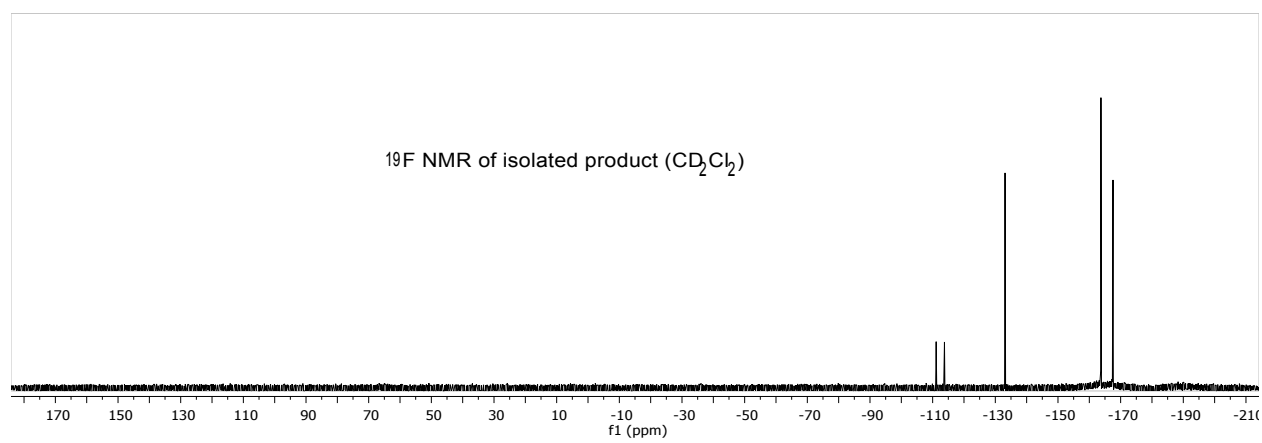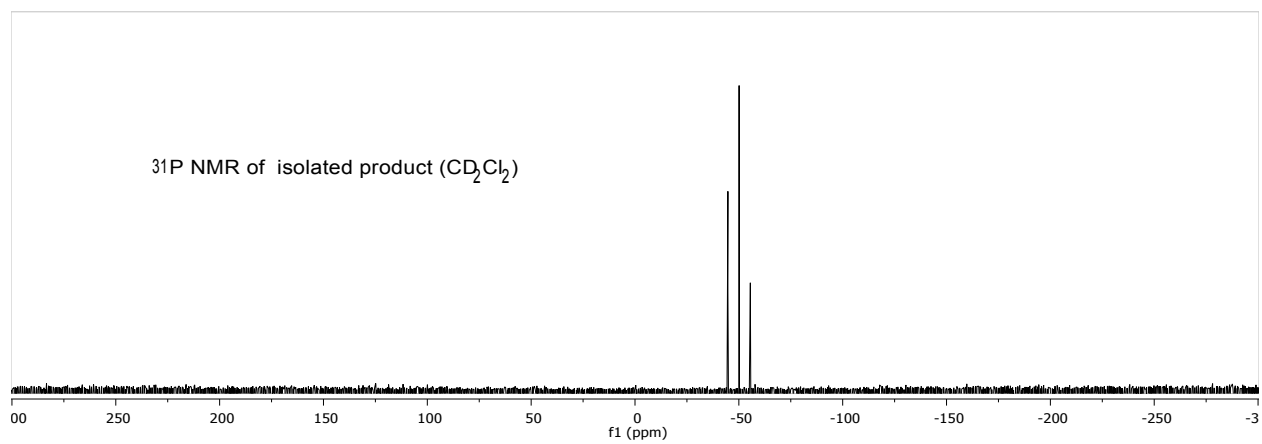

## 2.2

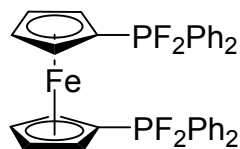

**Fe( $\eta^5$ -C<sub>5</sub>H<sub>4</sub>PF<sub>2</sub>Ph<sub>2</sub>)<sub>2</sub> 2** A solution of XeF<sub>2</sub> (34 mg, 0.20 mmol) in CH<sub>2</sub>Cl<sub>2</sub> (1 mL) was added dropwise to a solution of 1,1'-bis(diphenylphosphino)ferrocene (111 mg, 0.20 mmol) in CH<sub>2</sub>Cl<sub>2</sub> (1 mL). Effervescence was immediately observed. After stirring for 1-2 min. a yellow solid precipitated from the solution. This was filtered and washed with pentane (2 x 1mL) and dried *in vacuo* to give 118 mg of product (94% yield). <sup>1</sup>H NMR (CD<sub>2</sub>Cl<sub>2</sub>, [ppm]): 4.10 (m, 4H, Cp, H<sub>α</sub>), 4.62 (m, 4H, Cp CH<sub>β</sub>), 7.47 (m, 12H, *p*-Ph, *m*-Ph), 8.00 (m, 8H, *o*-Ph) <sup>13</sup>C{<sup>1</sup>H} NMR (CD<sub>2</sub>Cl<sub>2</sub>, [ppm]): 74.6 (dt, Cp C<sub>β</sub>, <sup>3</sup>J<sub>PC</sub> = 15 Hz, <sup>4</sup>J<sub>FC</sub> = 2 Hz), 77.2 (dt, Cp C<sub>α</sub>, <sup>2</sup>J<sub>PC</sub> = 18 Hz, <sup>3</sup>J<sub>FC</sub> = 10 Hz), 129.0 (td, *i*-Ph, <sup>2</sup>J<sub>PC</sub> = 17 Hz, <sup>4</sup>J<sub>FC</sub> = 2 Hz), 132.1 (s, *i*-Ph) 134.6 (dt, *m*-Ph, <sup>2</sup>J<sub>CP</sub> = 13 Hz, <sup>2</sup>J<sub>CF</sub> = 10 Hz), 138.5 (td, *i*-Ph <sup>1</sup>J<sub>PC</sub> = 182 Hz, <sup>2</sup>J<sub>FC</sub> = 28 Hz) Resonances for *ipso* carbon atoms on Cp moieties were not observed. <sup>19</sup>F{<sup>1</sup>H} NMR (CD<sub>2</sub>Cl<sub>2</sub>, [ppm]): -42.8 (d, <sup>1</sup>J<sub>PF</sub> = 662 Hz) <sup>31</sup>P{<sup>1</sup>H} NMR (CD<sub>2</sub>Cl<sub>2</sub>, [ppm]): -51.5 (t, <sup>1</sup>J<sub>PF</sub> = 662 Hz); Elemental Analysis for C<sub>34</sub>H<sub>28</sub>F<sub>4</sub>P<sub>2</sub>: calcd.: C 64.8, H 4.5, found: C: 64.9 H: 4.8. **HRMS** (ESI-QTOF+): m/z 587.0987 ([Fe( $\eta^5$ -C<sub>5</sub>H<sub>4</sub>P(OH)Ph<sub>2</sub>) ( $\eta^5$ -C<sub>5</sub>H<sub>4</sub>POPh<sub>2</sub>))] (calc.: 587.0992)

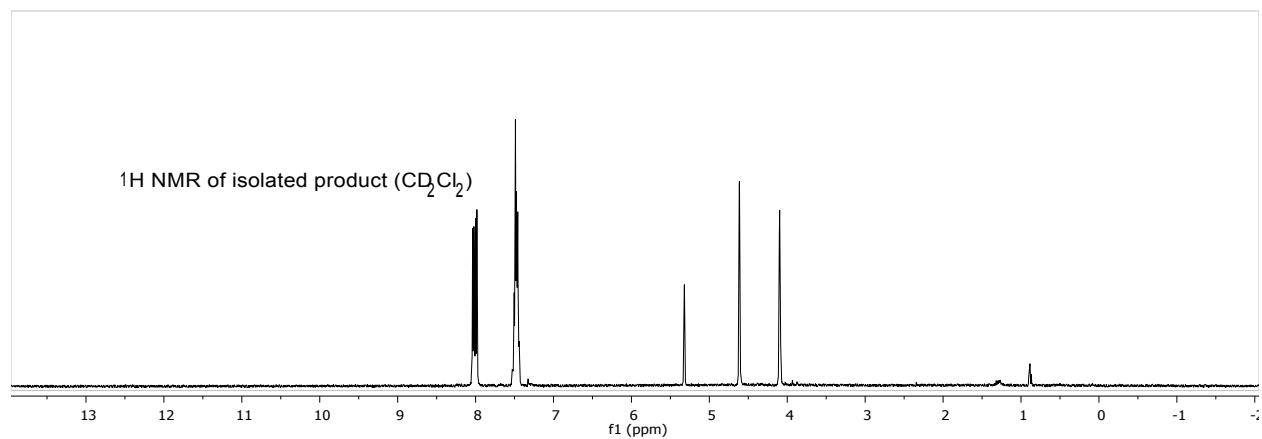

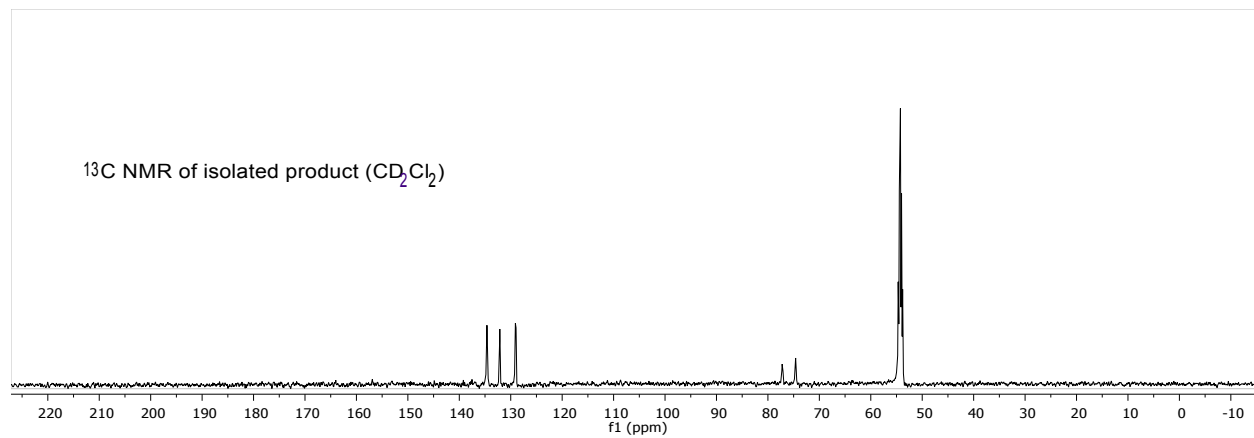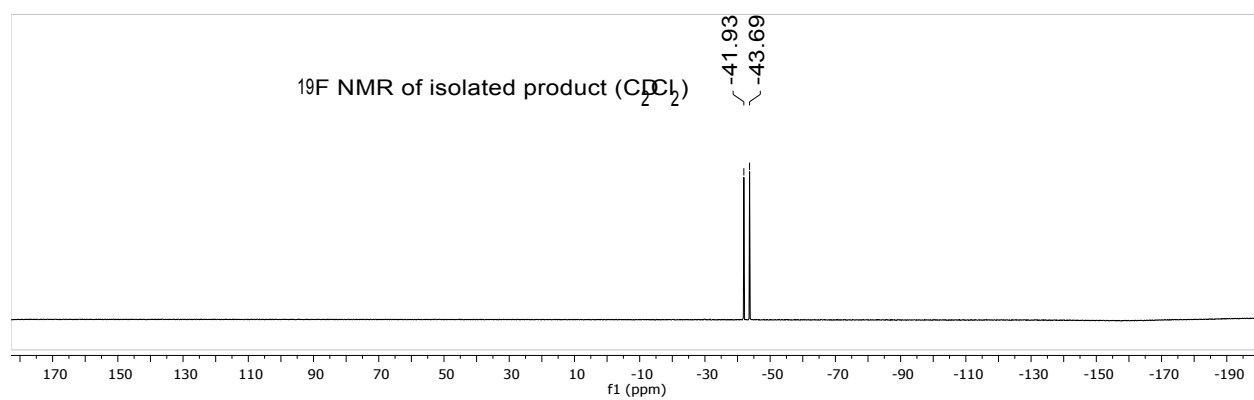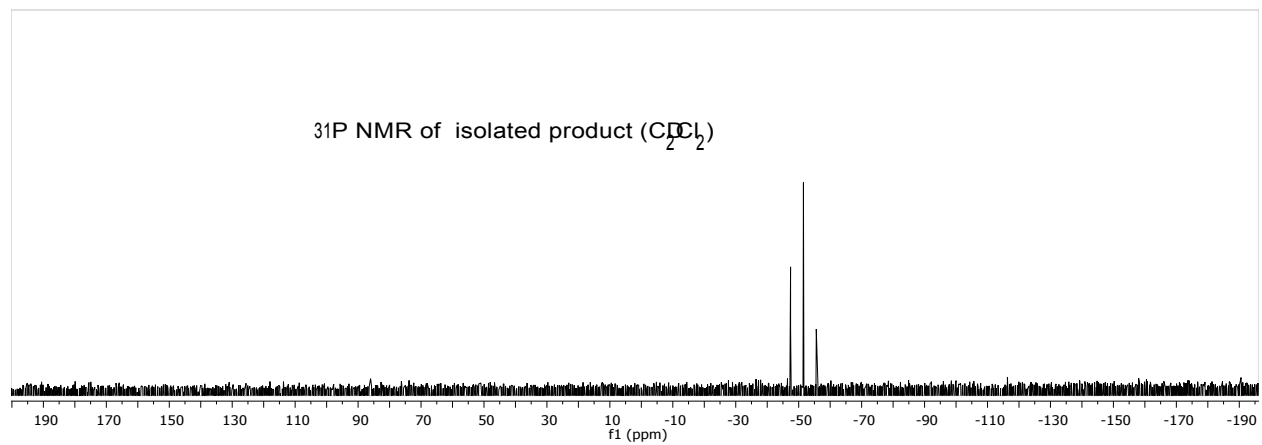



## 2.3

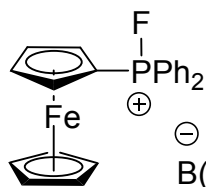

$\text{B}(\text{C}_6\text{F}_5)_4^-$  **3** To a solution of 41 mg (0.10 mmol)

**1** in toluene was added 186 mg freshly prepared  $[\text{Et}_3\text{Si}][\text{B}(\text{C}_6\text{F}_5)_4] \cdot 2(\text{C}_7\text{H}_8)$  (0.19 mmol, 1.9 equivalents). Stirring for 3 h resulted in precipitation of a dark yellow oil. Washing with toluene (1 x 0.5 mL) and pentane (3 x 0.5 mL) and drying *in vacuo* resulted in 90 mg of **3** as a dull orange solid (84% yield). X-ray quality crystals were obtained by slow diffusion of n-pentane into a saturated solution of **4** in dichloromethane at  $-35^\circ\text{C}$ ,  $^1\text{H}$  NMR ( $\text{CD}_2\text{Cl}_2$ , [ppm]): 4.50 (s, 5H, Cp), 4.64 (m, 2H, Cp,  $\text{H}_\alpha$ ), 5.07 (m, 2H, Cp,  $\text{H}_\beta$ ), 7.79-7.85 (m, 8H, *o*-Ph, *m*-Ph), 7.99 (t, 2H, *p*-Ph, ,  $^3J_{\text{HH}} = 7$  Hz)  $^{11}\text{B}$  NMR ( $\text{CD}_2\text{Cl}_2$ , [ppm]): - 16.7  $^{13}\text{C}\{^1\text{H}\}$  NMR ( $\text{CD}_2\text{Cl}_2$ , [ppm]): 72.3 (s, Cp), 75.2 (d, Cp  $\text{C}_\alpha$ ,  $^2J_{\text{PC}} = 17$  Hz), 77.9 (d, Cp  $\text{C}_\beta$ ,  $^3J_{\text{PC}} = 13$  Hz), 131.3 (d, Ph,  $J_{\text{PC}} = 14$  Hz), 133.5 (d, Ph,  $J_{\text{PC}} = 13$  Hz), 138.5 (s, Ph) signals for ipso carbon atom not observed.  $^{19}\text{F}\{^1\text{H}\}$  NMR ( $\text{CD}_2\text{Cl}_2$ , [ppm]): - 112.5 (d,  $^1J_{\text{PF}} = 998$  Hz)  $^{31}\text{P}\{^1\text{H}\}$  NMR ( $\text{CD}_2\text{Cl}_2$ , [ppm]): 102.9 (d,  $^1J_{\text{PF}} = 998$  Hz) Elemental Analysis for  $\text{C}_{46}\text{H}_{19}\text{BF}_{21}\text{PF}$ : calcd.: C 51.8, H 1.8, found: C: 51.0, H: 1.5; **HRMS** (ESI-QTOF+):  $m/z$  387.0596 ( $[\text{CpFe}(\eta^5\text{-C}_5\text{H}_4\text{POPh}_2)]$ ) (calc.: 387.0601)

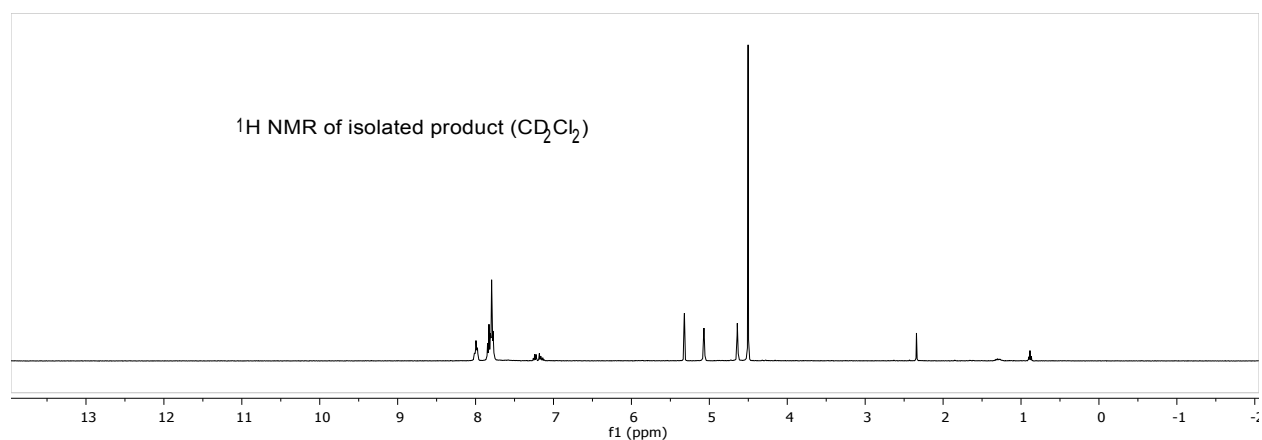

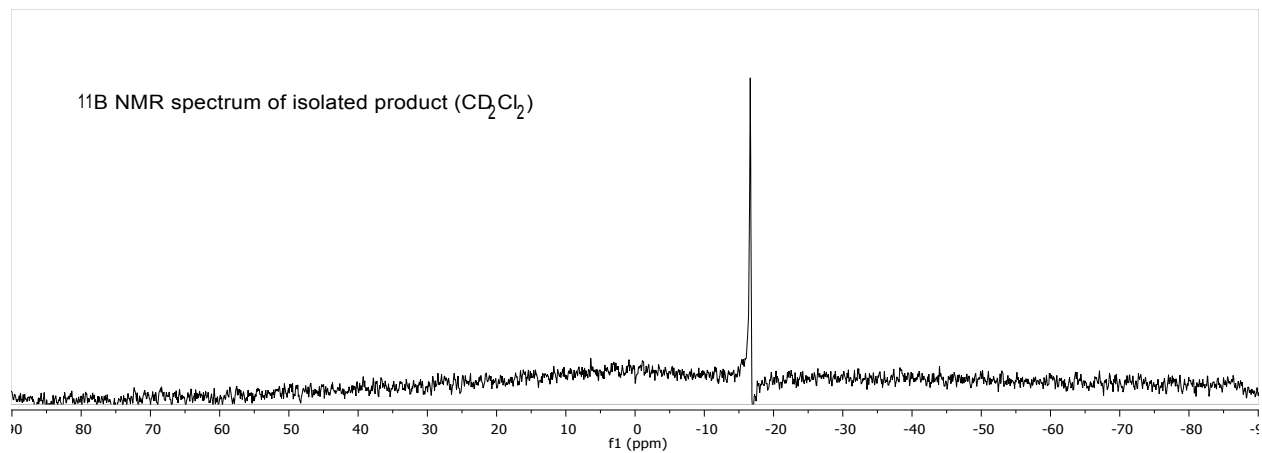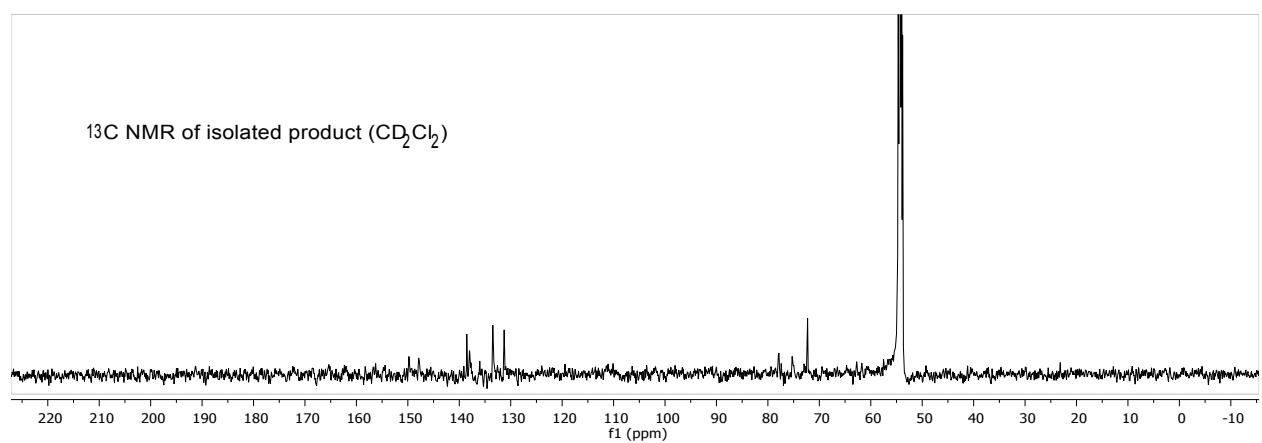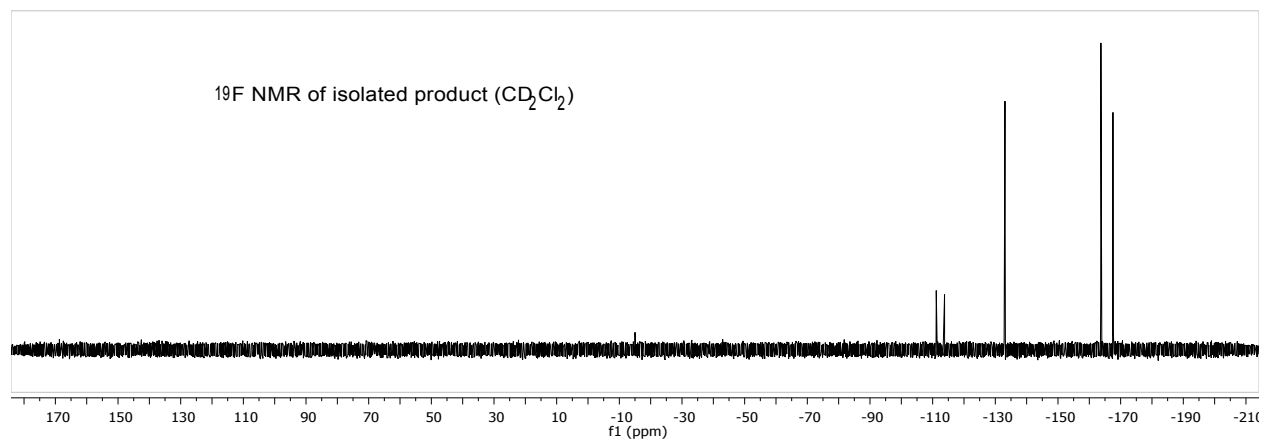

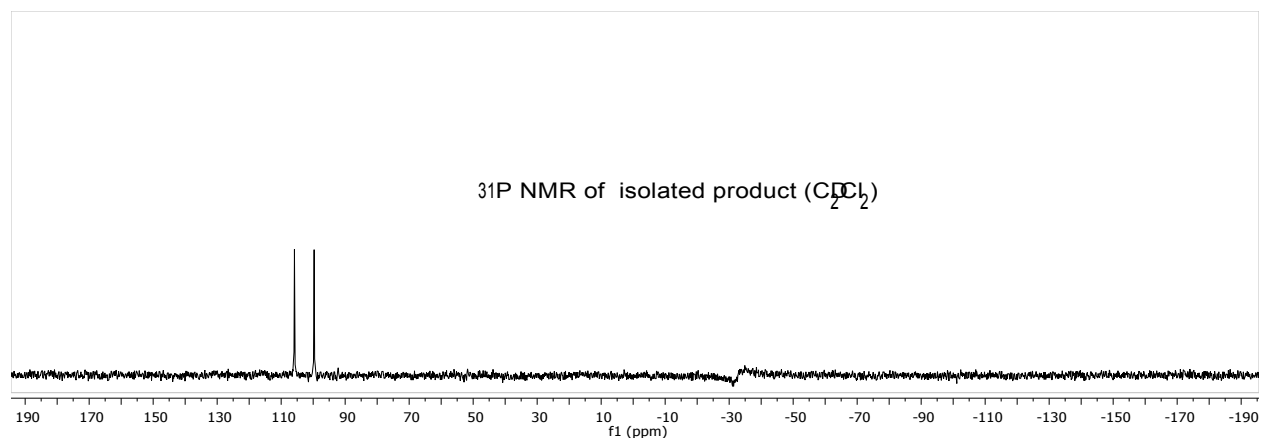

## 2.4

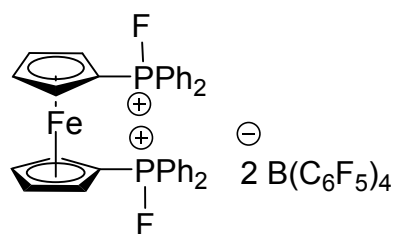

$[\text{Fe}(\eta^5\text{-C}_5\text{H}_4\text{PFPh}_2)_2] 2[\text{B}(\text{C}_6\text{F}_5)_4]$  **4**

To a solution of 63 mg (0.10 mmol) **2** in toluene was added 186 mg freshly prepared  $[\text{Et}_3\text{Si}][\text{B}(\text{C}_6\text{F}_5)_4] \cdot 2(\text{C}_7\text{H}_8)$  (0.19 mmol, 1.9 equivalents). Stirring for 3 hours resulted in precipitation of a dark yellow oil. Washing with toluene (1 x 0.5 mL) and pentane (3 x 0.5 mL) and drying *in vacuo* resulted in 156 mg of **4** as a dull orange solid (80% yield). X-ray quality crystals were obtained by slow diffusion of *n*-pentane into a saturated solution of **4** in dichloromethane at  $-35^\circ\text{C}$ ,  $^1\text{H}$  NMR ( $\text{CD}_2\text{Cl}_2$ , [ppm]): 4.51 (m, Cp  $\text{CH}_\alpha$ ), 5.19 (m, 4H, Cp  $\text{CH}_\beta$ ), 7.47 (m, 12H, *p*-Ph, *m*-Ph), 7.72 (m, 4H, Ph), 7.79 (m, 4H, Ph), 8.04 (m, 2H, *p*-Ph)  $^{11}\text{B}$  NMR ( $\text{CD}_2\text{Cl}_2$ , [ppm]): -16.7  $^{13}\text{C}\{^1\text{H}\}$  NMR ( $\text{CD}_2\text{Cl}_2$ , [ppm]): 74.6 (d, Cp  $\text{C}_\beta$ ,  $^3J_{\text{PC}} = 15$  Hz), 77.2 (m, Cp  $\text{C}_\alpha$ ), 129.0 (d, *i*-Ph,  $^2J_{\text{PC}} = 17$  Hz), 132.1 (s, *m*-Ph), 134.5 (d, *o*-Ph,  $^2J_{\text{CP}} = 11$  Hz). Signals for *ipso* carbon atoms on Cp, phenyl rings not observed.  $^{19}\text{F}\{^1\text{H}\}$  NMR ( $\text{CD}_2\text{Cl}_2$ , [ppm]): -42.8 (d,  $^1J_{\text{PF}} = 662$  Hz)  $^1\text{ }^{31}\text{P}\{^1\text{H}\}$  NMR ( $\text{CD}_2\text{Cl}_2$ , [ppm]): -51.5 (t,  $^1J_{\text{PF}} = 662$  Hz); Elemental Analysis for  $\text{C}_{82}\text{H}_{28}\text{B}_2\text{F}_{42}\text{P}_2\text{Fe}$ : calcd.: C 50.5, H 1.5, found: C 51.0, H 1.5; **HRMS** (ESI-QTOF+):  $m/z$  587.0987 ( $[\text{Fe}(\eta^5\text{-C}_5\text{H}_4\text{P}(\text{OH})\text{Ph}_2)(\eta^5\text{-C}_5\text{H}_4\text{POPPh}_2)]$ ) (calc.: 587.0992)

$^1\text{H}$  NMR spectrum of isolated product ( $\text{CD}_2\text{Cl}_2$ )

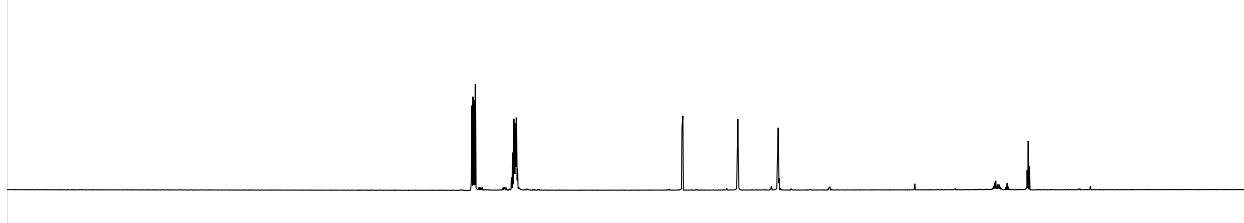

$^{11}\text{B}$  NMR of isolated product ( $\text{CD}_2\text{Cl}_2$ )

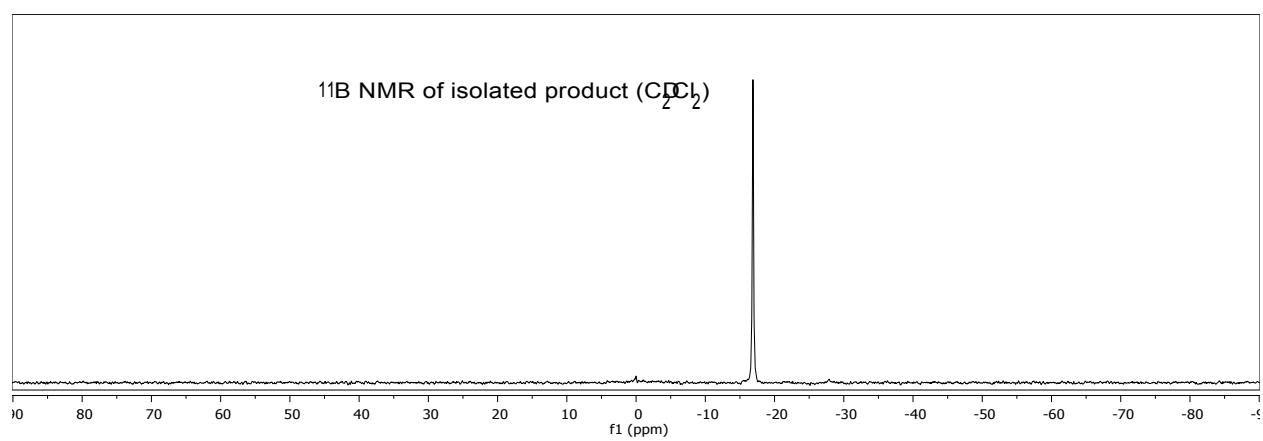

$^{13}\text{C}$  NMR spectrum of isolated product ( $\text{CD}_2\text{Cl}_2$ )

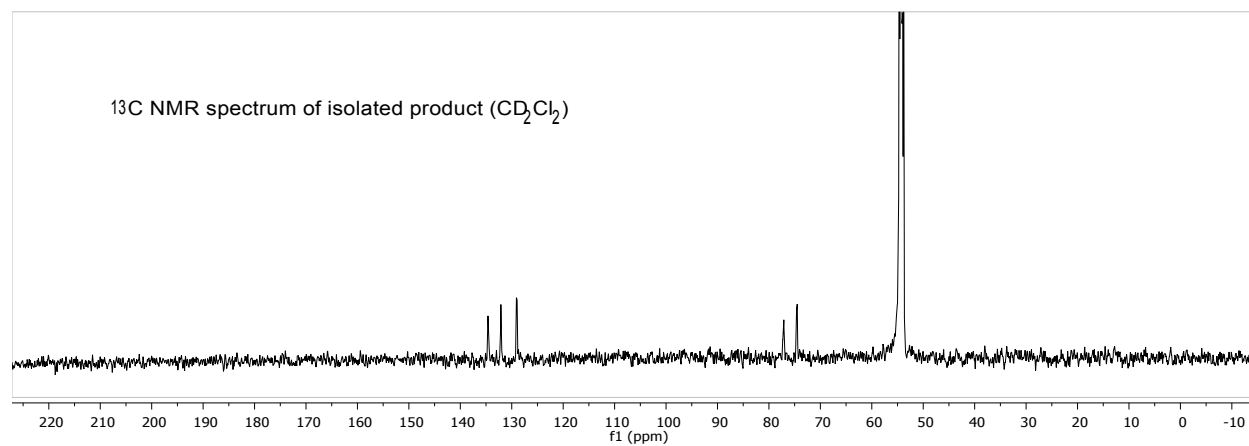

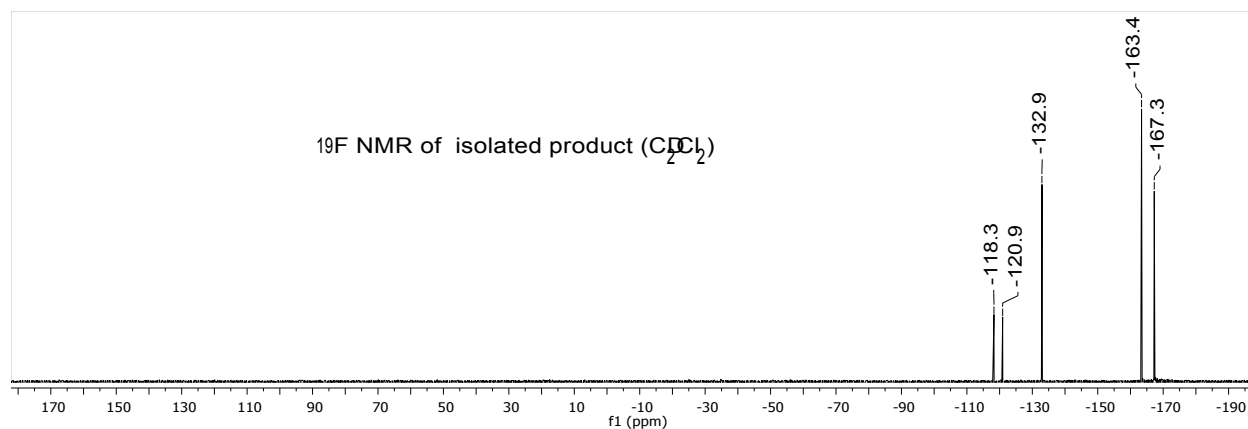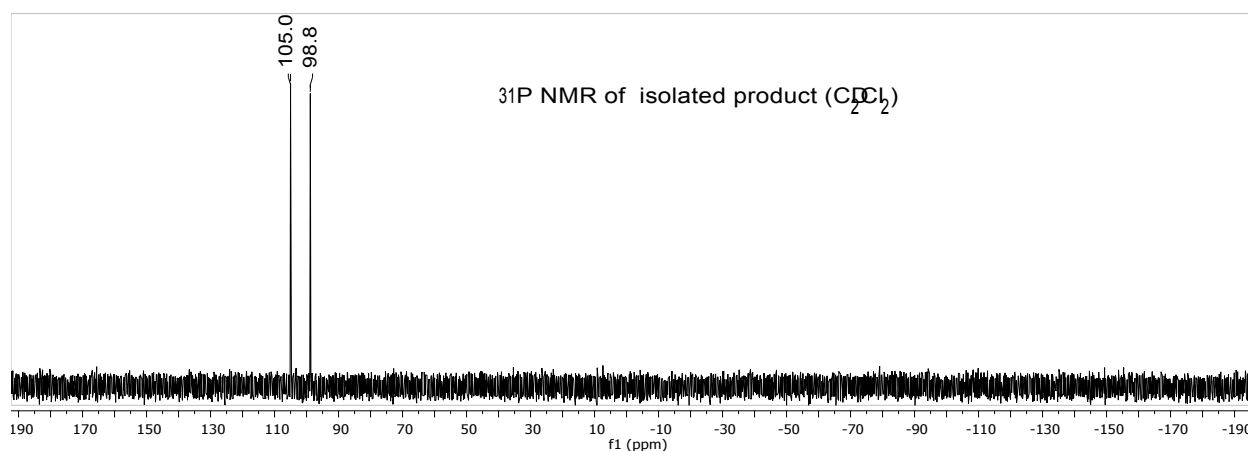

## 2.5

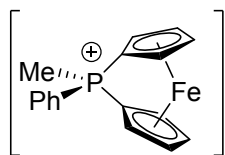

[B(C<sub>6</sub>F<sub>5</sub>)<sub>4</sub>]

**[PhMeP(η<sup>5</sup>-C<sub>5</sub>H<sub>4</sub>)<sub>2</sub>Fe][B(C<sub>6</sub>F<sub>5</sub>)<sub>4</sub>]** 7 To a solution of Fe(η-C<sub>5</sub>H<sub>4</sub>)<sub>2</sub>PPh in toluene

was added a solution of MeOTf in toluene. Successive precipitations yielded .050 g of the product (80% yield). <sup>1</sup>H NMR (CD<sub>2</sub>Cl<sub>2</sub>, [ppm]): 2.39 (d, 3H, CH<sub>3</sub>, <sup>2</sup>J<sub>PH</sub> = 14 Hz), 4.50 (m, 2H, Cp), 4.80 (m, 2H, Cp), 5.06 (m, 2H, Cp), 5.11 (m, 2H, Cp), 7.79-7.85 (m, 4H, *o*-Ph, *m*-Ph), 7.99 (t, 1H, *p*-Ph, <sup>3</sup>J<sub>HH</sub> = 7 Hz) <sup>11</sup>B{<sup>1</sup>H}: - 16.7 <sup>13</sup>C {<sup>1</sup>H} NMR (CD<sub>2</sub>Cl<sub>2</sub>, [ppm]): 12.1 (d, Me, <sup>1</sup>J<sub>CP</sub> = 221 Hz), 72.3 (s, Cp), 75.2 (d, Cp, <sup>2</sup>J<sub>PC</sub> = 17 Hz), 77.9 (d, Cp <sup>3</sup>J<sub>PC</sub> = 13 Hz), 131.3 (d, Ph, <sup>2</sup>J<sub>PC</sub> = 14 Hz),

133.5 (d, Ph,  $^3J_{PC} = 13$  Hz), 138.5 (s, Ph) signals for ipso carbon atom not observed.  $^{31}\text{P}$  { $^1\text{H}$ } NMR ( $\text{CD}_2\text{Cl}_2$ , [ppm]): 35.6. Elemental Analysis for  $\text{C}_{41}\text{H}_{16}\text{BF}_{20}\text{P}$ : calcd.: C 49.9 H 1.6 found: C 50.2, H 1.9 **HRMS** (ESI-QTOF+):  $m/z$  307.0343 (**(Ph(O)P( $\eta^5\text{-C}_5\text{H}_4$ ) $_2$ Fe)**) (calc.: 307.0339)

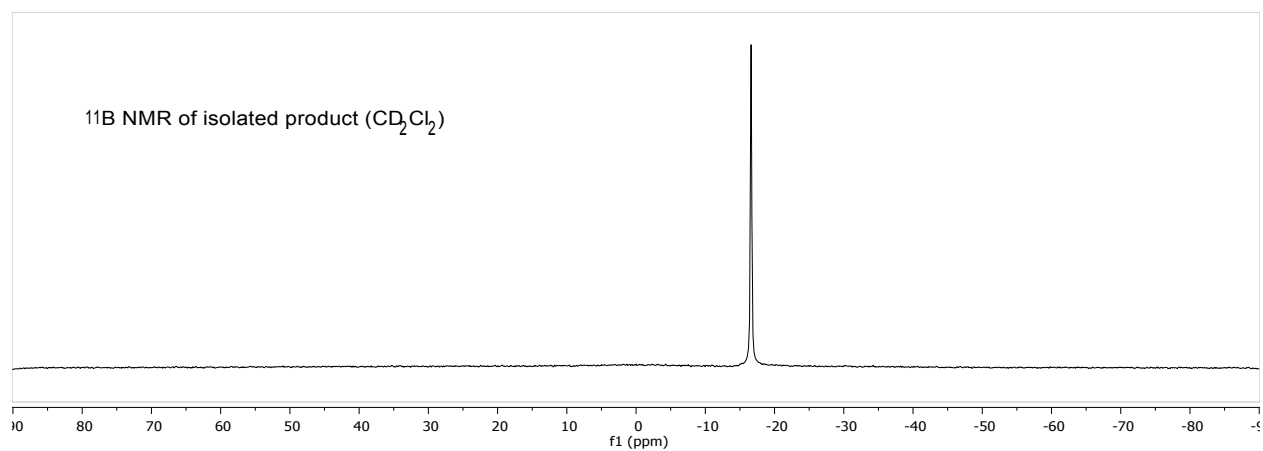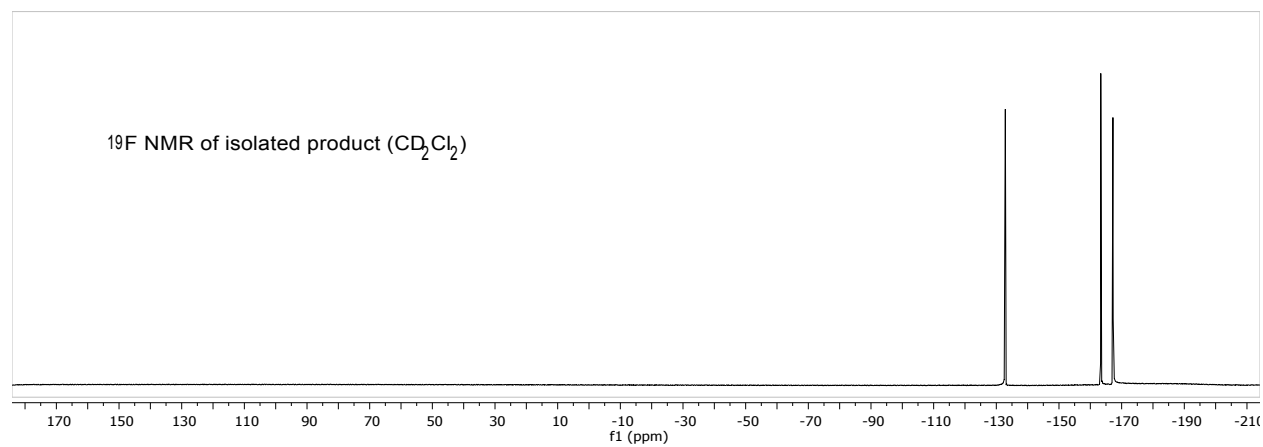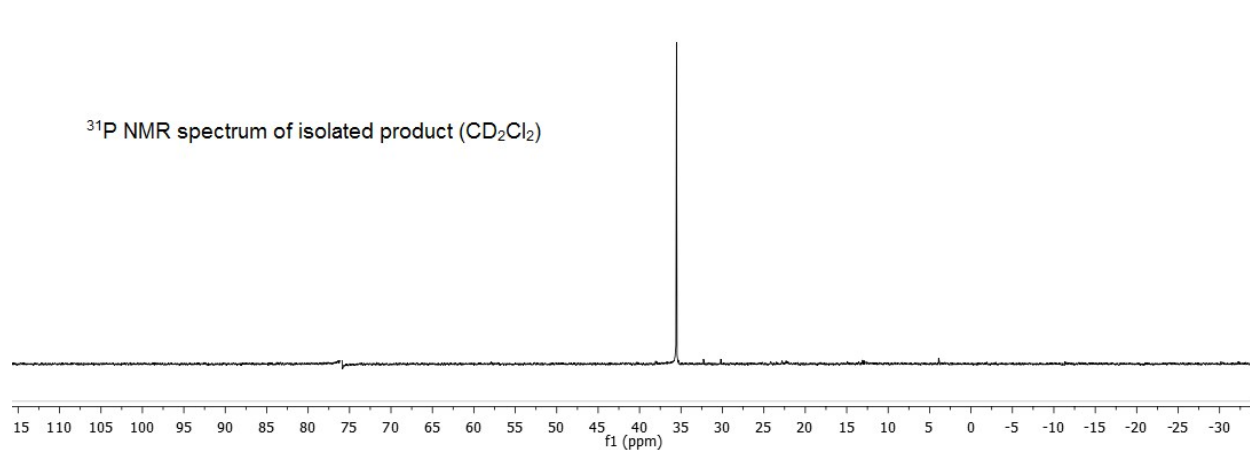

## 2.6 Cyclic Voltammogram of 3

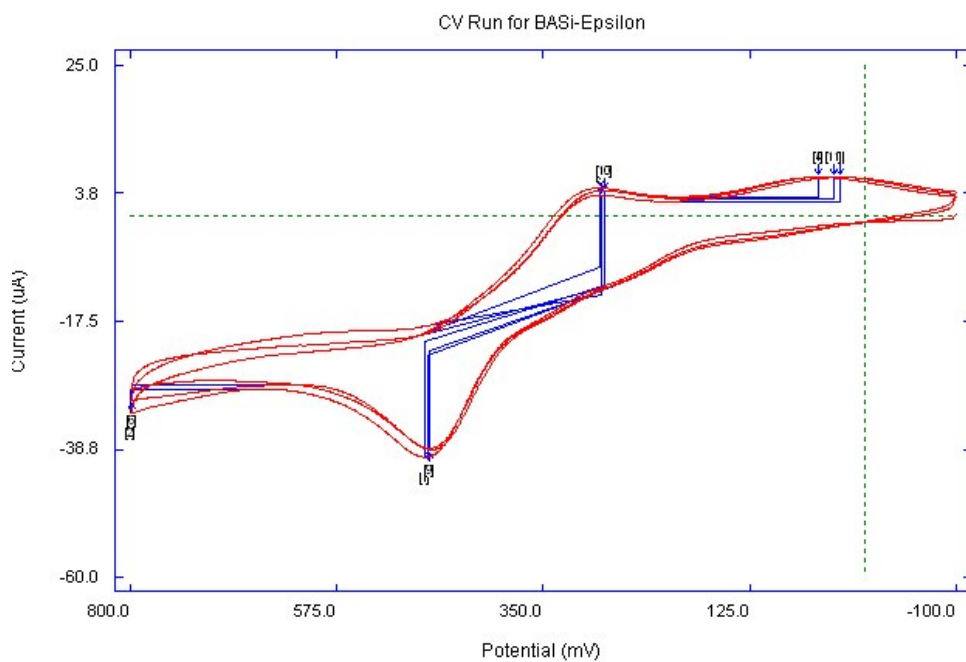

Cyclic voltammogram obtained in  $\text{CH}_2\text{Cl}_2$  with 0.1M  $[\text{nBu}_4\text{N}][\text{PF}_6]$  as electrolyte and referenced against ferrocene (glassy carbon working electrode, step = 5mV, sc = 200 mV/s).

## 2 Lewis Acid Catalysis

### 2.1 Friedel-Crafts dimerization of 1,1-diphenylethylene with **3**, **4** and **7** as catalysts

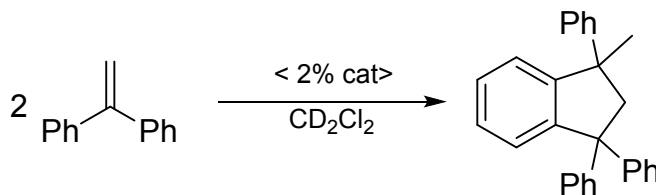

- 3** (2 mol%, 50°C, 4 d): 10% conversion  
**4** (2 mol%, rt, 2 d): > 99% conversion  
**7** (2 mol%, 50 °C, 3 d): 0% conversion

Catalyst **3** (2.1 mg, 2 mol%), **4** (3.9 mg, 2 mol%) or **7** (2.2 mg, 2 mol%) were added to a solution of 1,1-diphenylethylene (18 mg, 0.1 mmol) in  $\text{CD}_2\text{Cl}_2$  (0.7 mL). The reaction mixtures were either left at ambient temperature (**4**) or heated to 50 °C for 2-4 days (**3,7**) and monitored by NMR spectroscopy. After the reaction catalyzed by **4** had been observed to go to completion by NMR, all volatiles were removed from the reaction mixture *in vacuo* and the remaining residue was suspended in n-pentane. The mixture was filtered through a Celite plug and the solvent was removed *in vacuo* resulting in isolated 1-methyl-1,3,3-triphenyl-2,3-dihydro-1H-indene as a colorless solid (15.9 mg, 88% yield). The isolated product was re-dissolved in  $\text{C}_6\text{D}_6$ ; NMR data is reported in this solvent.<sup>[S3]</sup>

**$^1\text{H}$  NMR ( $\text{C}_6\text{D}_6$ , [ppm]):**  $\delta$  = 1.48 (3H, s,  $\text{CH}_3$ ), 3.02 (1H, d,  $\text{CH}_2$ ,  $^3J_{\text{HH}} = 14$  Hz), 3.42 (1H, d,  $\text{CH}_2$ ,  $^3J_{\text{HH}} = 14$  Hz), 6.90 - 7.23 (19H, m);  **$^{13}\text{C}\{^1\text{H}\}$  ( $\text{C}_6\text{D}_6$ , [ppm]):**  $\delta$  = 29.1 (1C, s,  $\text{CH}_3$ ), 51.5 (1C, s,  $\text{CH}_2$ ), 61.4 (1C, s, CPh), 61.8 (1C, s, CPh), 125.4 (1C, s, Ph), 125.9 (1C, s, Ph), 126.0 (1C, s, Ph), 126.3 (1C, s, Ph), 127.3 (1C, s, Ph), 127.3 (2C, s, Ph), 127.9 (2C, s, Ph), 128.0 (2C, s, Ph), 128.3 (2C, s, Ph), 128.3 (2C, s, Ph), 129.1 (2C, s, Ph), 129.3 (2C, s, Ph), 147.9 (1C, s, Ph), 149.1 (1C, s, Ph), 149.4 (1C, s, Ph), 149.7 (1C, s, Ph), 151.0 (1C, s, Ph).



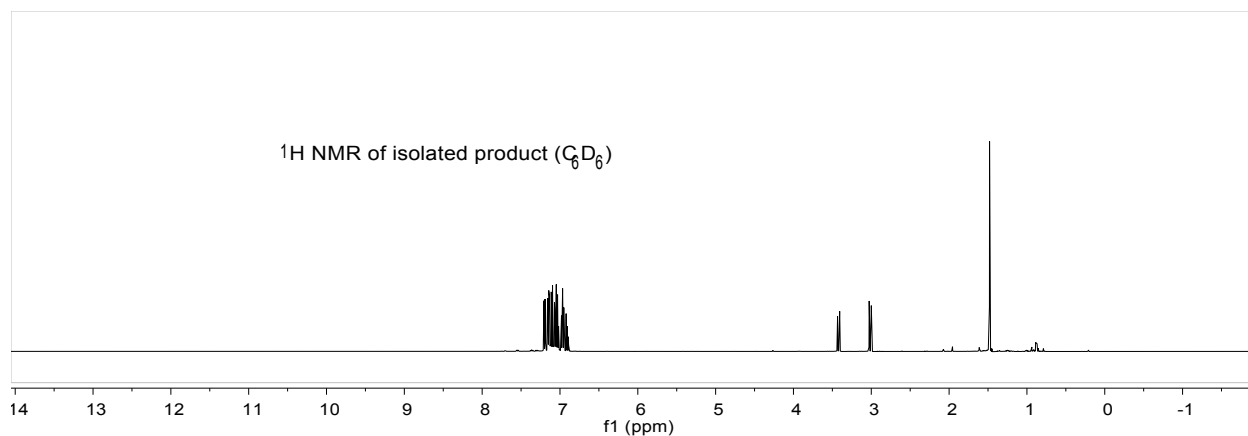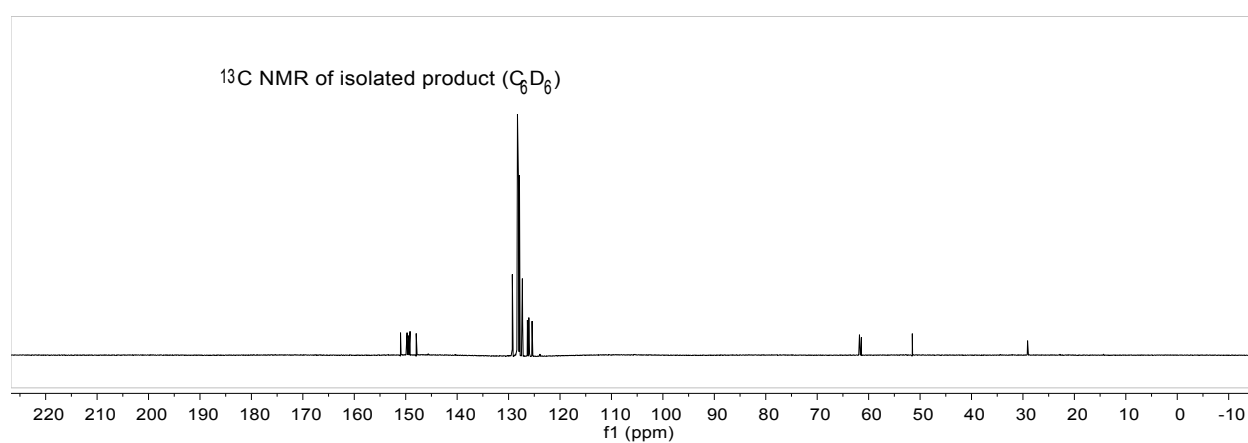

## 2.2 Dehydrocoupling of Et<sub>3</sub>SiH and Phenol with **3**, **4** and **7** as catalysts.

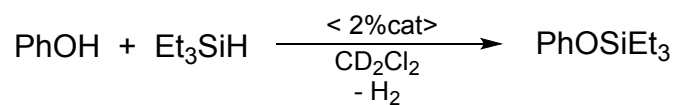

**3** (7 d, 50 °C): 97% conversion

**4** (1 d, rt): >99% conversion

**7** (3 d, 50 °C): 0% conversion

Catalyst **3** (2.1 mg, 2 mol%), **4** (3.9 mg, 2 mol%) or **7** (2.2 mg, 2 mol%) were added to a solution of Et<sub>3</sub>SiH (17 μL, 0.10 mmol) and PhOH (9.4 mg, 0.10 mmol) in CD<sub>2</sub>Cl<sub>2</sub> (0.7 mL) at ambient temperature. The reaction mixtures were either left at ambient temperature (**4**) or heated to 50 °C for 2-4 days (**3,7**) and monitored by NMR spectroscopy. After the reaction catalyzed by **4** had been observed to go to completion by NMR, all volatiles were removed *in vacuo* and the remaining residue was suspended in *n*-pentane. The mixture was filtered through a Celite plug and the solvent was removed *in vacuo* giving triethyl(phenoxy)silane as a colourless oil (16.2 mg, 78% yield).<sup>[S3]</sup>

**<sup>1</sup>H NMR (CD<sub>2</sub>Cl<sub>2</sub>, [ppm]):** δ = 0.75 (6H, quart. of d., CH<sub>2</sub>, <sup>3</sup>J<sub>HH</sub> = 8 Hz), 0.96 (9H, t, CH<sub>3</sub>, <sup>3</sup>J<sub>HH</sub> = 8 Hz), 6.85 (1H, t, *p*-Ph, <sup>3</sup>J<sub>HH</sub> = 7 Hz), 6.89 - 6.94 (2H, m, *o*/*m*-Ph), 7.07 - 7.15 (2H, m, *o*/*m*-Ph); **<sup>13</sup>C{<sup>1</sup>H} (C<sub>6</sub>D<sub>6</sub>, [ppm]):** δ = 5.4 (3C, s, CH<sub>2</sub>), 6.9 (3C, s, CH<sub>3</sub>), 120.3 (2C, s, *o*/*m*-Ph), 121.7 (1C, s, *p*-Ph), 129.8 (2C, s, *o*/*m*-Ph), 156.2 (1C, s, *i*-Ph).

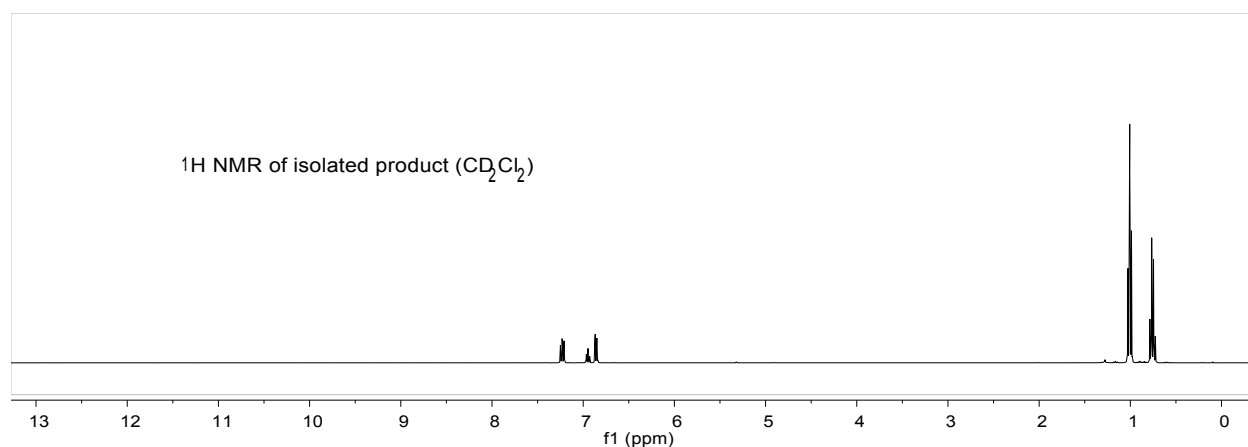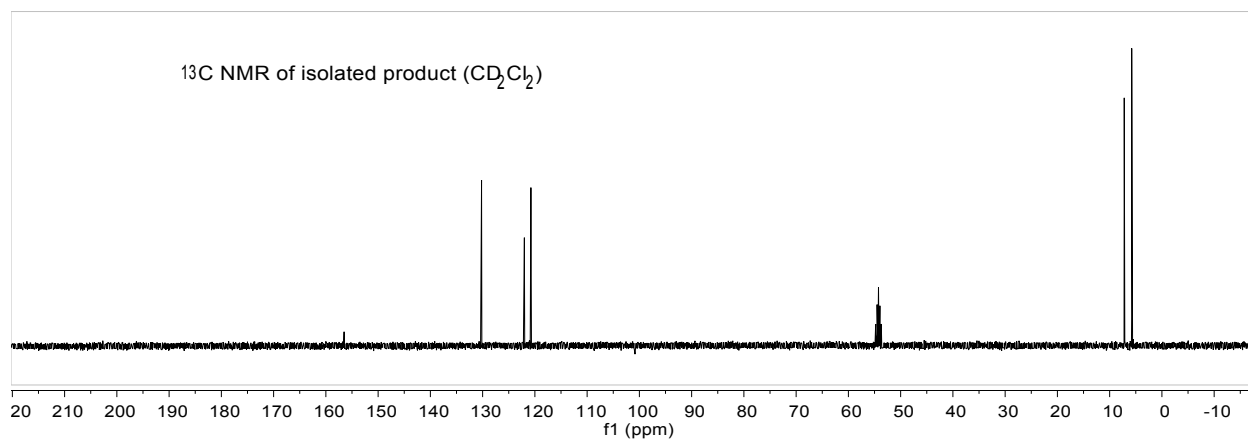

### 2.3 Hydrodefluorination of fluoropentane in the presence of Et<sub>3</sub>SiH using **3**, **4** and **7** as catalysts.

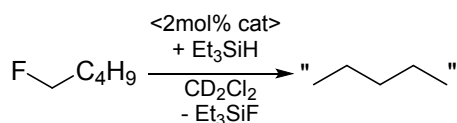

**3** : <1% (4 d, 50 °C)

**4** : 55% (7 d, rt)

**7** : 0% (3 d, 50 °C)

Catalyst **2** (2.1 mg, 2 mol%), **4** (3.9 mg, 2 mol%), or **7** (2.0 mg, 2 mol%) were added to a solution of Et<sub>3</sub>SiH (17 μL, 0.10 mmol) and fluoropentane (9 mg, 0.10 mmol) in CD<sub>2</sub>Cl<sub>2</sub> (0.7 mL). The reaction mixture containing catalyst **2** was left at ambient temperature and monitored at intervals by <sup>1</sup>H, <sup>13</sup>C and <sup>19</sup>F NMR spectroscopy over seven days, while the reaction mixtures of **4** and **7** were heated to 50 °C for 4 days. Conversion was determined by means of <sup>19</sup>F NMR spectroscopy (consumption of fluoropentane and formation of Et<sub>3</sub>SiF).<sup>[S3]</sup>

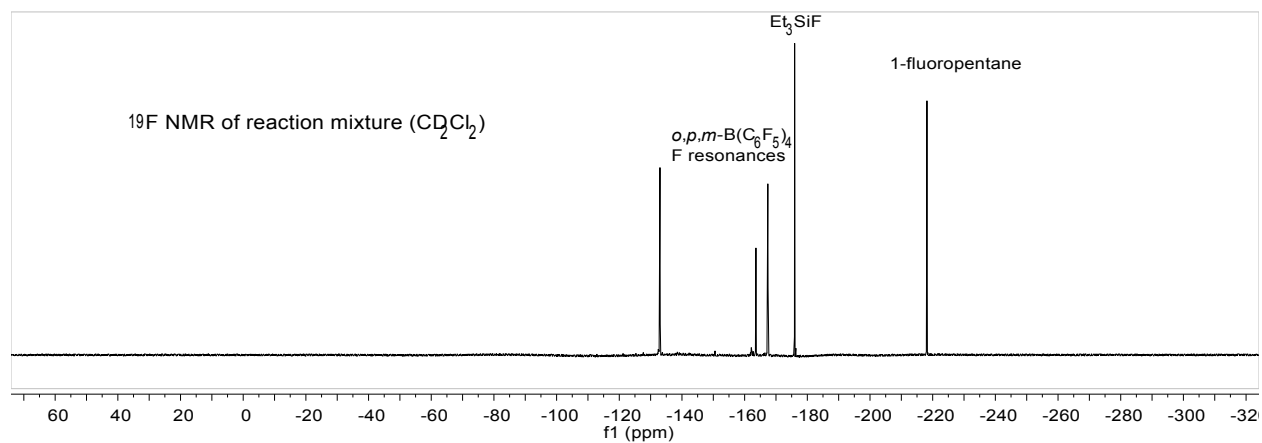

<sup>19</sup>F NMR spectrum of reaction with catalyst **4** after 7 d at ambient temperature showing 1-fluoropentane product, unreacted Et<sub>3</sub>SiF, and resonances for B(C<sub>6</sub>F<sub>5</sub>)<sub>4</sub> anion (P-F doublet of dication too small to be seen in this view).

## 2.4 Hydrodeoxygenation of Ketones

### 2.4.1 General Procedure for Ketone Hydrodeoxygenation

All reactions were carried out under identical conditions on a 0.1 mmol scale. In a glove box the respective catalysts (2 mol%, **3**: 2.1 mg, **4**: 3.9 mg) were added to a solution of Et<sub>3</sub>SiH (0.21 mmol – 2.1 Eq) in CD<sub>2</sub>Cl<sub>2</sub> (0.7 mL). 0.10 mmol (one equivalent) of the respective substrate was then added. The reaction mixture was transferred to a NMR tube, sealed and monitored by <sup>1</sup>H NMR <sup>13</sup>C NMR spectroscopy in all cases as well as <sup>19</sup>F NMR spectroscopy in the case of 4-fluorobenzophenone. When catalyst **4** was used >90% deoxygenation was obtained for most substrates. 1-benzyl-4-methoxybenzene was isolated by filtering the reaction mixture through Celite and removing bis(triethylsilyl) *in vacuo*. For other samples toluene was added as an internal standard to determine degree of conversion after the times reported herein. The bis(triethylsilyl) ether by-product can be observed in the spectra of the reaction mixtures.

### 2.4.2 Ethylbenzene [S4]

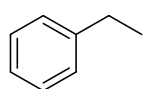

<sup>1</sup>H NMR (400 MHz, CD<sub>2</sub>Cl<sub>2</sub>): δ = 7.26 (m, 5H); 2.70 (q, <sup>3</sup>J<sub>HH</sub> = 8 Hz, 2H); 1.29 (t, <sup>3</sup>J<sub>HH</sub> = 8 Hz, 3H); <sup>13</sup>C NMR (100 MHz, CD<sub>2</sub>Cl<sub>2</sub>): δ = 145.3; 129.2; 128.7; 126.4;

29.8; 16.4 ppm.

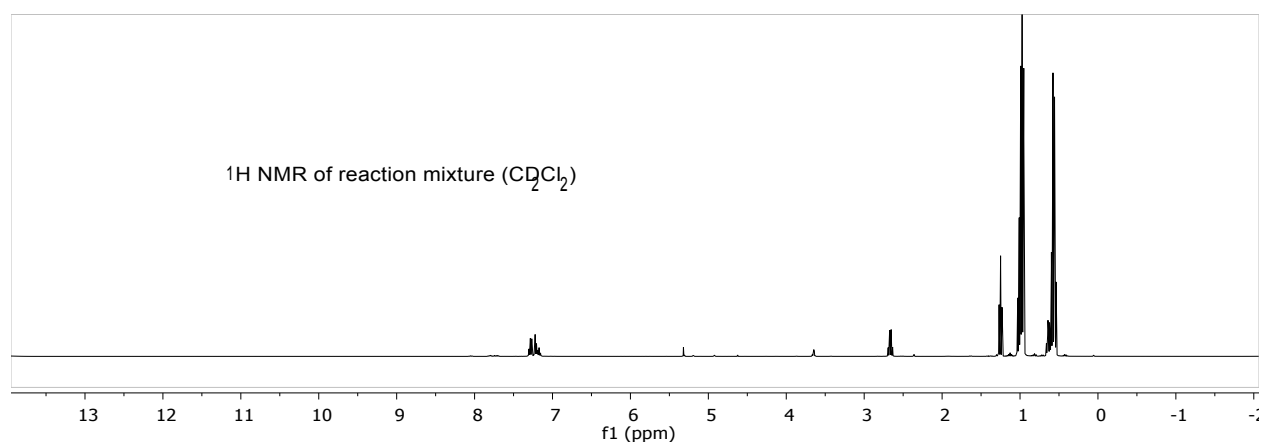

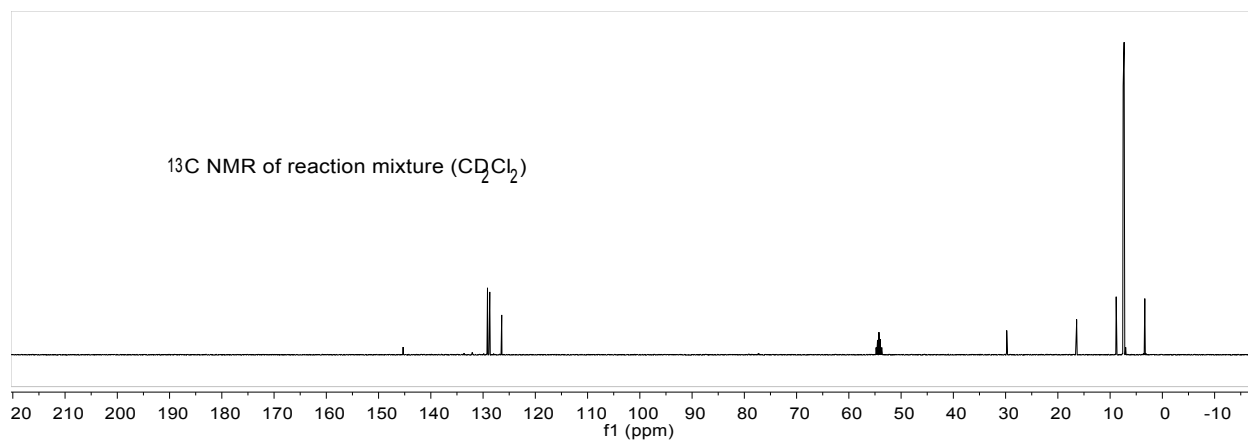

### 2.4.3 1-Benzyl-4-fluorobenzene<sup>[S4]</sup>

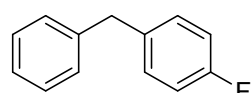

<sup>1</sup>H NMR (500 MHz, CD<sub>2</sub>Cl<sub>2</sub>):  $\delta$  = 7.30 (m, 2H); 7.20 (m, 5H); 7.00 (m, 2H); 3.97 (s, 2H); <sup>13</sup>C NMR (126 MHz, CD<sub>2</sub>Cl<sub>2</sub>):  $\delta$  = 162.0 (d, <sup>1</sup>J<sub>CF</sub> = 243 Hz); 141.8; 137.8; 130.9; 129.3 (d, <sup>2</sup>J<sub>CF</sub> = 34 Hz); 126.8; 115.7 (d, <sup>3</sup>J<sub>CF</sub> = 21 Hz); 41.6; <sup>19</sup>F NMR (376 MHz, CD<sub>2</sub>Cl<sub>2</sub>):  $\delta$  = -118.1 (s) ppm.

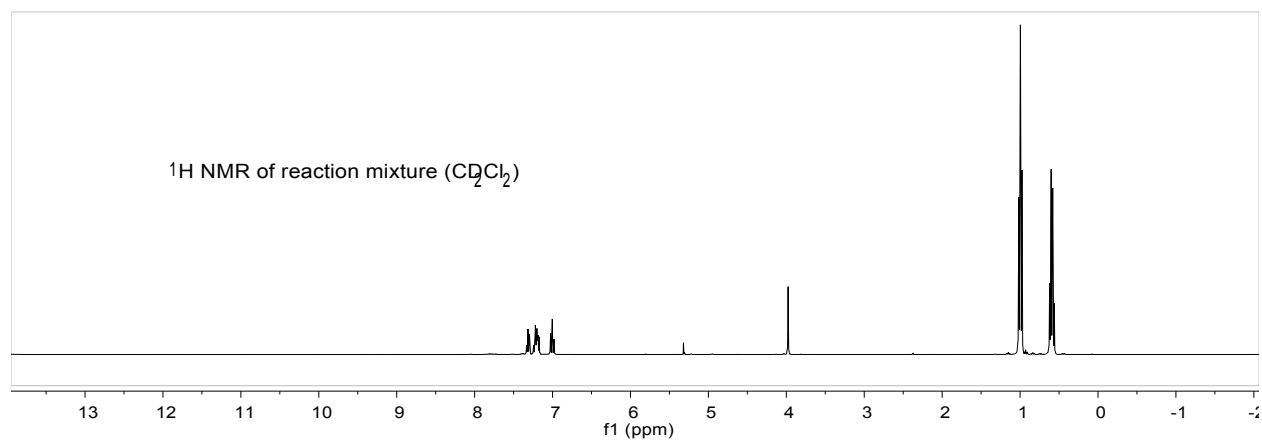

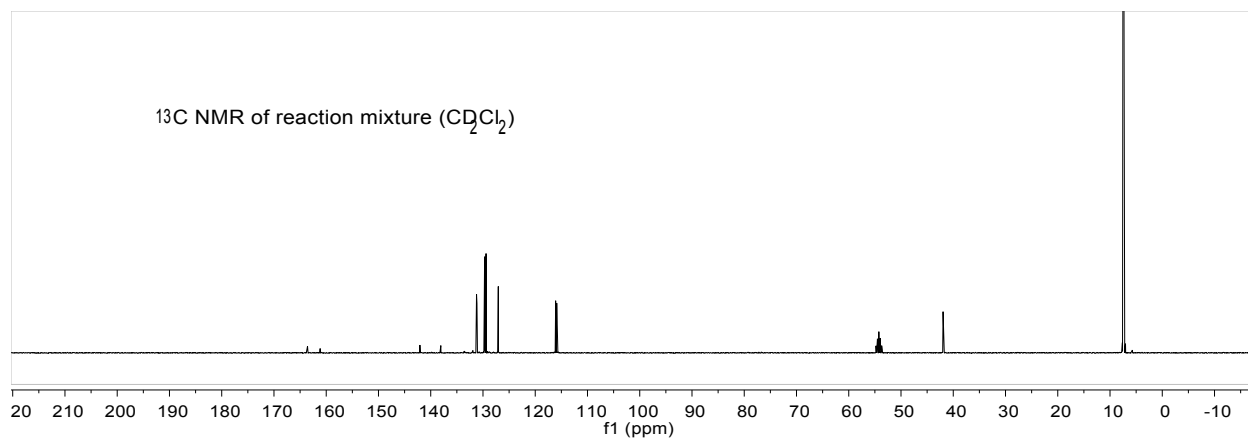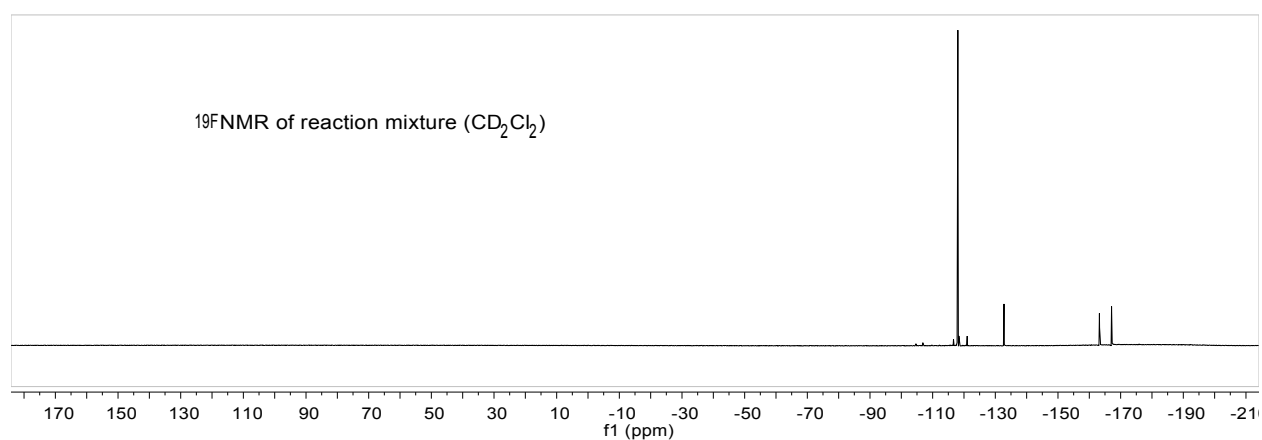

#### 2.4.4 1-Benzyl-4-bromobenzene<sup>[S4]</sup>

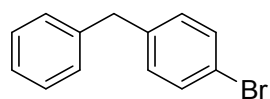

<sup>1</sup>H NMR (500 MHz, CD<sub>2</sub>Cl<sub>2</sub>):  $\delta$  = 7.43 (m, 2H); 7.30 (m, 2H); 7.22 (m, 1H); 7.20 (m, 2H); 7.11 (m, 2H); 3.94 (s, 2H); <sup>13</sup>C NMR (126 MHz, CD<sub>2</sub>Cl<sub>2</sub>):  $\delta$  = 141.5; 141.3; 132.3; 131.4; 129.7; 129.4; 127.1; 120.6; 42.0 ppm.

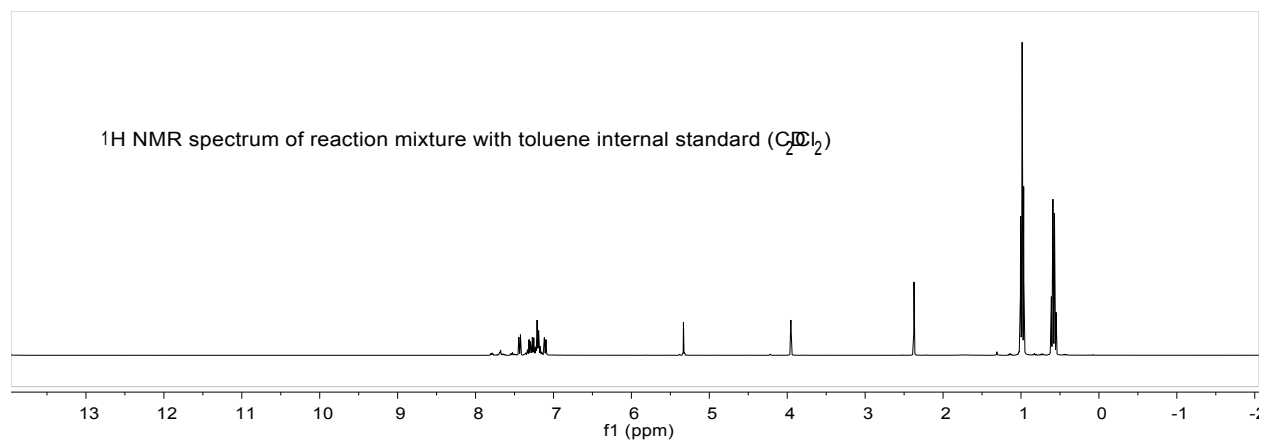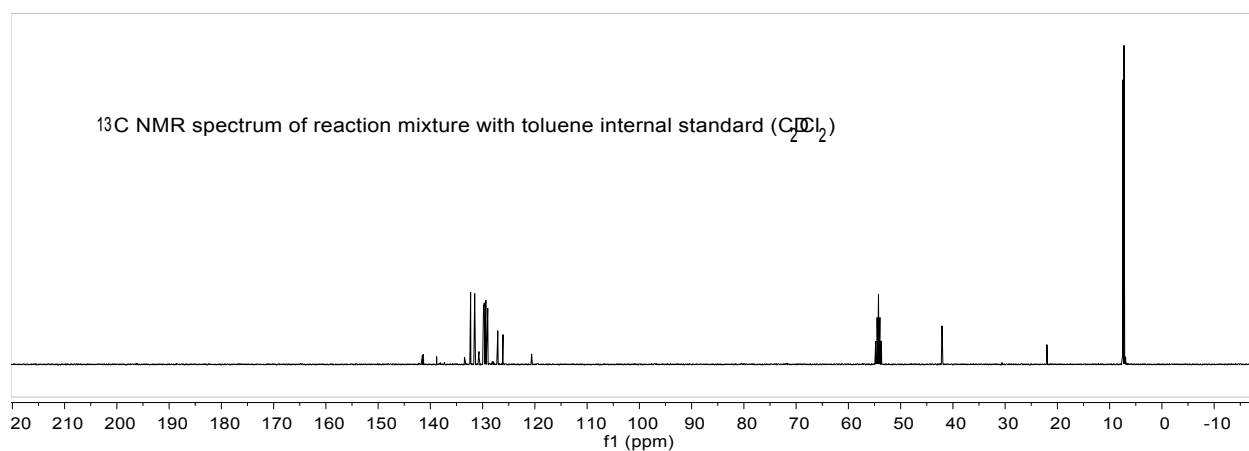

### 2.4.5 1,2-Bis(4-methoxyphenyl)ethane<sup>[S4]</sup>

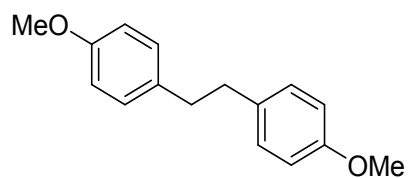

**<sup>1</sup>H NMR (500 MHz, CD<sub>2</sub>Cl<sub>2</sub>):**  $\delta$  = 7.09 (m, 4H); 6.81 (m, 4H); 3.76 (s, 6H); 2.83 (s, 4H); **<sup>13</sup>C NMR (126 MHz, CD<sub>2</sub>Cl<sub>2</sub>):**  $\delta$  = 158.8; 134.7; 130.2; 114.4; 55.4; 38.0 ppm. **DART MS:** m/z: 260.16538 (calcd. for M+NH<sub>4</sub><sup>+</sup>: 260.16505).

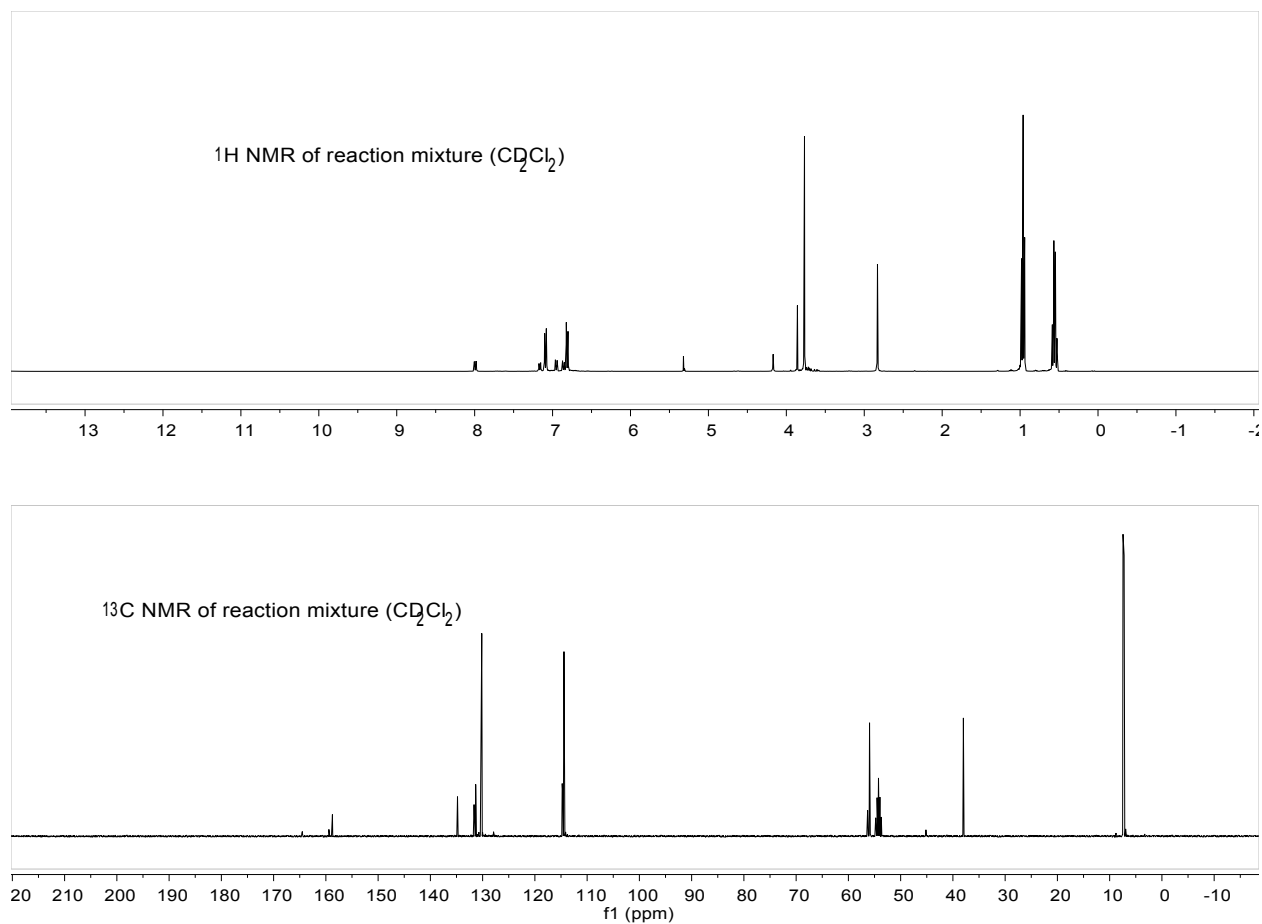

#### 2.4.6 1-Benzyl-4-methoxybenzene<sup>[S4]</sup>

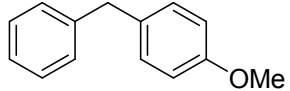
**Isolated Yield = 81%. <sup>1</sup>H NMR (500 MHz, CD<sub>2</sub>Cl<sub>2</sub>):**  $\delta$  = 7.28 (m, 2H); 7.19 (m, 3H); 7.12 (m, 2H); 6.84 (m, 2H); 3.92 (s, 2H); 3.77 (s, 3H); **<sup>13</sup>C NMR (126 MHz, CD<sub>2</sub>Cl<sub>2</sub>):**  $\delta$  = 158.9; 142.7; 134.3; 130.6; 129.5; 129.2; 126.7; 114.6; 56.0; 41.8 ppm. **DART MS:** m/z: 216.13914 (calcd. for M+NH<sub>4</sub><sup>+</sup>: 216.13884).



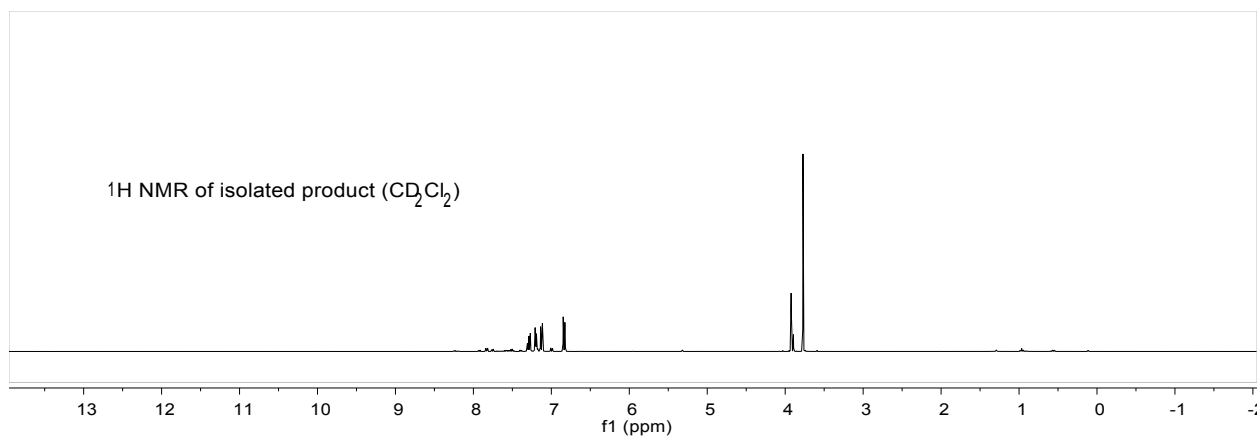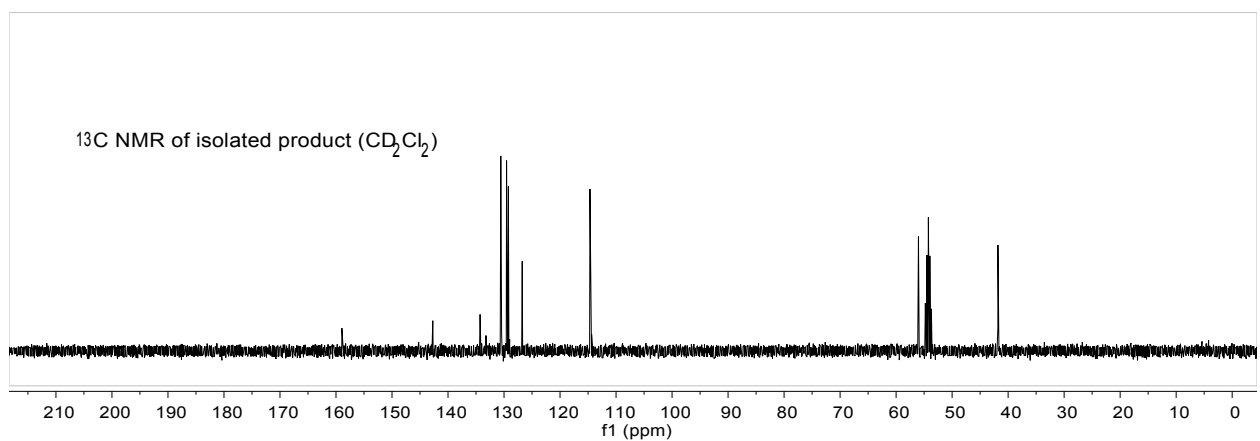

## 2.4.7 Isopentane<sup>[S4]</sup>

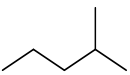
<sup>1</sup>H NMR (400 MHz, CD<sub>2</sub>Cl<sub>2</sub>):  $\delta$  = 1.55 (m, 1H); 1.30 (m, 2H); 1.17 (m, 2H), 0.88 (d,  $^3J_{\text{HH}}$  = 6.8 Hz 6H); 0.87 (m, 3H overlapping d); <sup>13</sup>C{<sup>1</sup>H} NMR (100 MHz, CD<sub>2</sub>Cl<sub>2</sub>):  $\delta$  = 42.0; 28.3; 23.0; 21.8; 14.7.

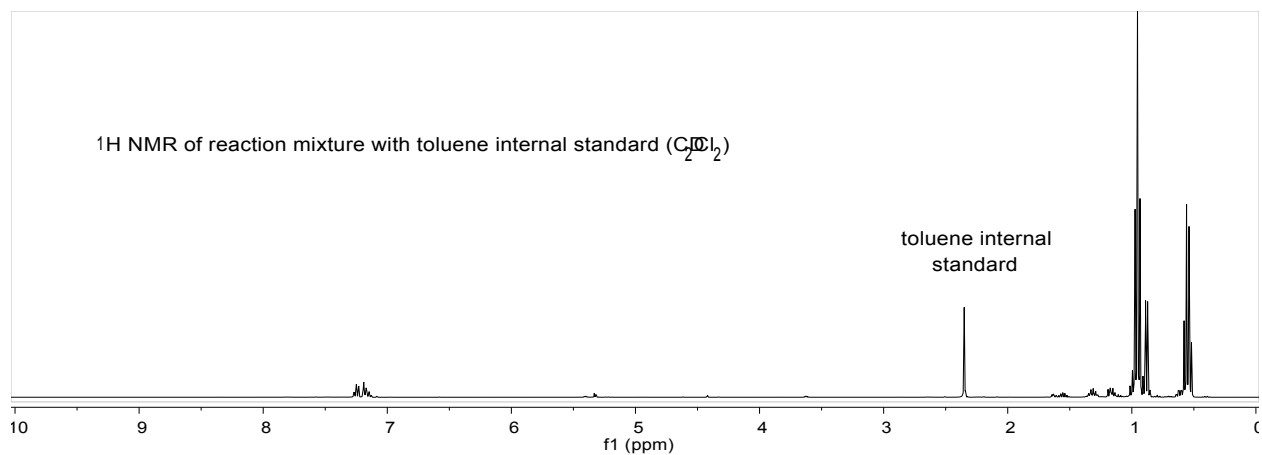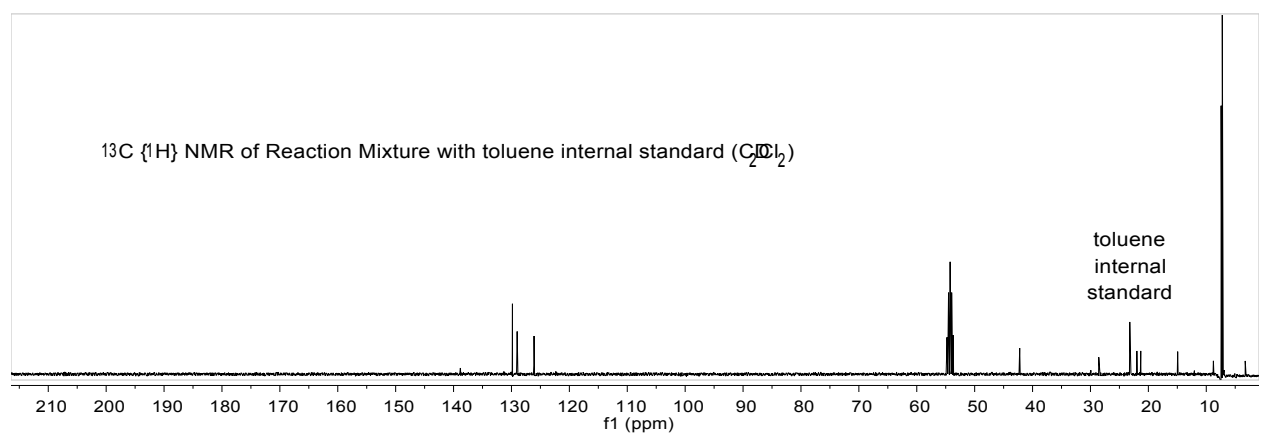

## 2.4.8 Diphenylmethane <sup>[S4]</sup>

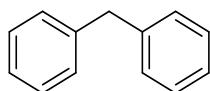

$^1\text{H}$  NMR (500 MHz,  $\text{CD}_2\text{Cl}_2$ ):  $\delta = 7.29$  (m, 4H); 7.20 (m, 6H); 3.98 (s, 2H);

$^{13}\text{C}\{^1\text{H}\}$  NMR (126 MHz,  $\text{CD}_2\text{Cl}_2$ ):  $\delta = 141.4$ ; 128.8; 128.4; 126.0; 41.9 ppm.

DART MS: m/z: (calcd. for  $\text{M}+\text{NH}_4^+$ : 186.12827).

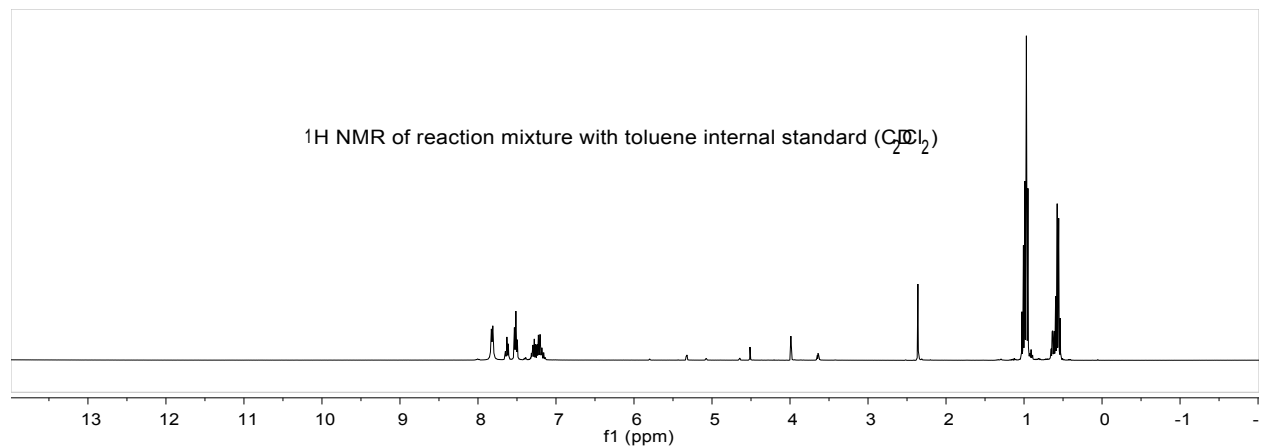

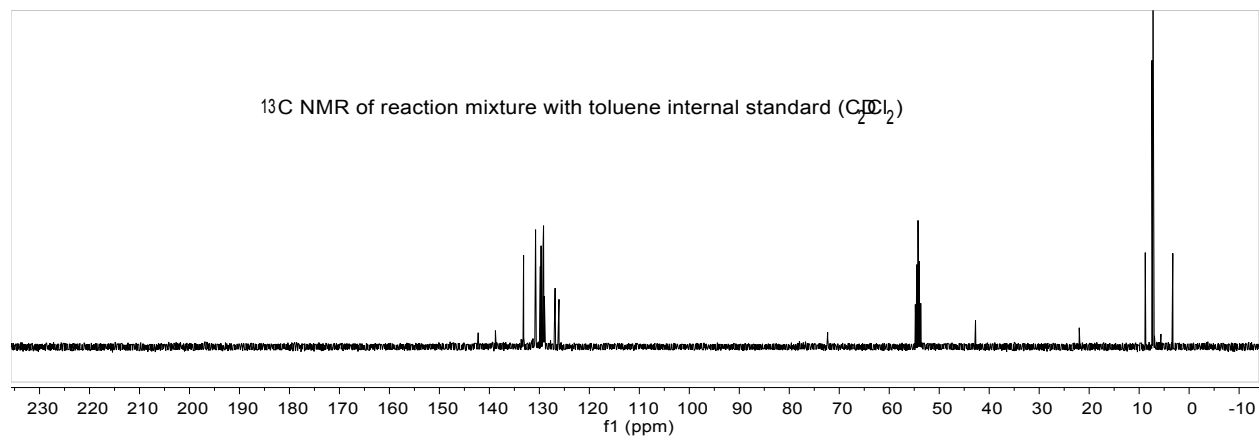

## 2.4.9 Phenylcyclohexylmethane<sup>[S4]</sup>

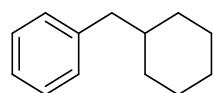

<sup>1</sup>H NMR (500 MHz, CD<sub>2</sub>Cl<sub>2</sub>):  $\delta$  = 7.27 (m, 2H); 7.18 (m, 3H); 2.50 (d, 2H, <sup>1</sup>J<sub>HH</sub> = 7.1Hz); 1.89 (m, H); 1.69 (m, 6H); 1.51 (m, 2H); 1.21 (m, 2H) <sup>13</sup>C{<sup>1</sup>H}

NMR (126 MHz, CD<sub>2</sub>Cl<sub>2</sub>):  $\delta$  = 141.4; 128.8; 128.4; 126.0; 41.9 ppm. EI MS:

m/z: 174.1405 (calcd. for M<sup>+</sup>: 174.1409).

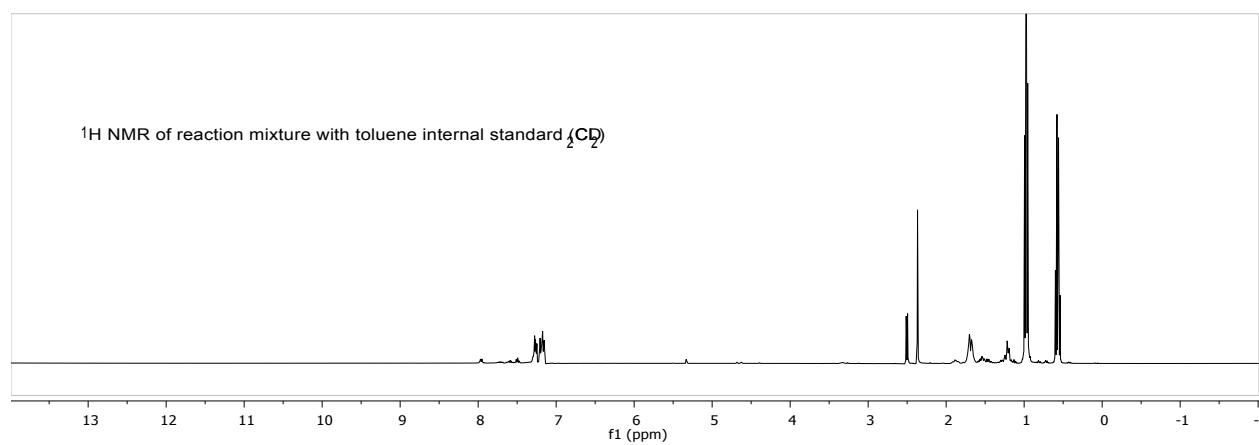

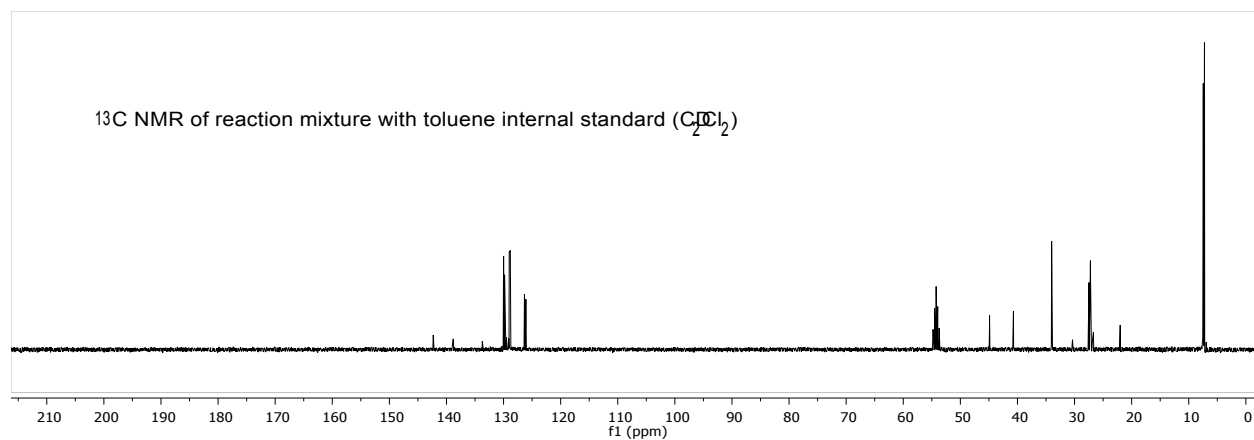

#### 2.4.10 1-Benzyl-4-methoxybenzene<sup>[S4]</sup>

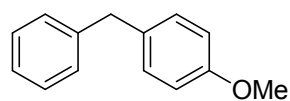

**Isolated Yield = 80%. <sup>1</sup>H NMR (500 MHz, CD<sub>2</sub>Cl<sub>2</sub>):**  $\delta$  = 7.28 (m, 2H); 7.19 (m, 3H); 7.12 (m, 2H); 6.84 (m, 2H); 3.92 (s, 2H); 3.77 (s, 3H); **<sup>13</sup>C NMR (126 MHz, CD<sub>2</sub>Cl<sub>2</sub>):**  $\delta$  = 158.9; 142.7; 134.2; 130.5; 129.5; 129.2; 126.7; 114.6; 55.7; 41.5 ppm. **DART MS: m/z: 216.13914 (calcd. for M+NH<sub>4</sub><sup>+</sup>: 216.13884).**

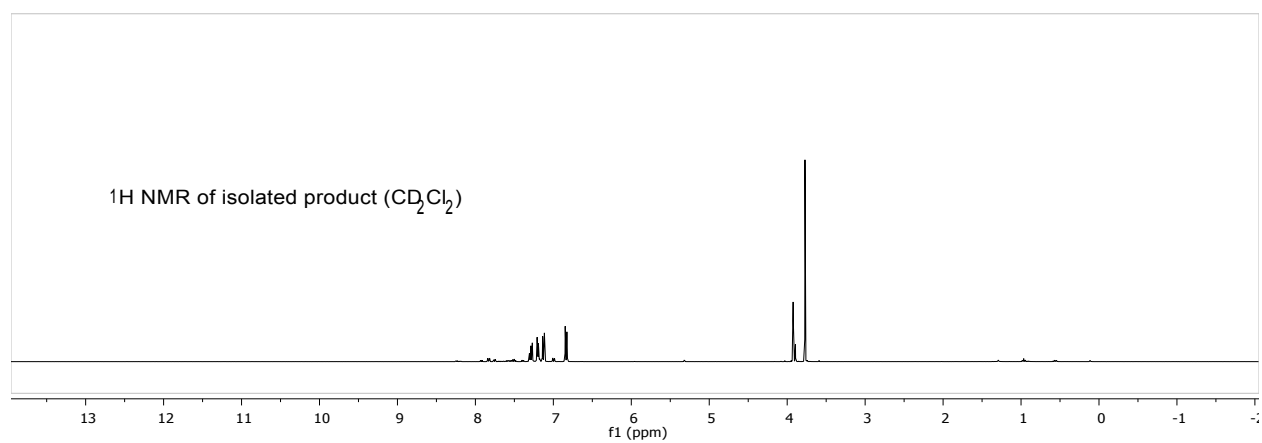

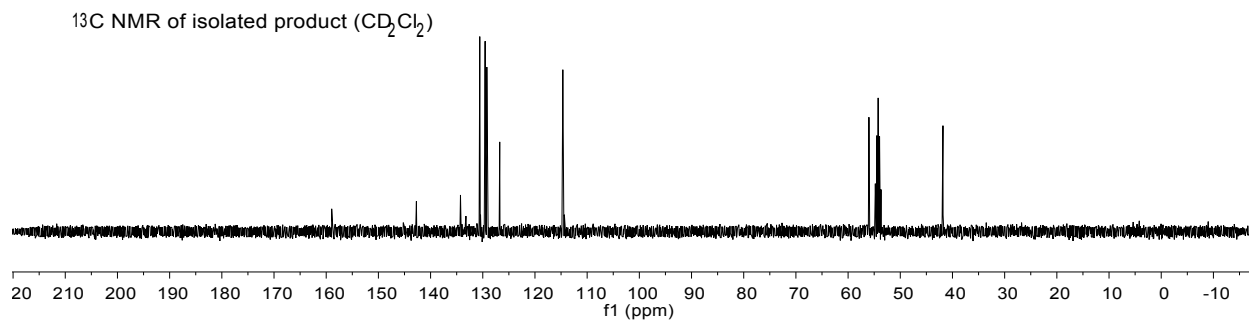

### 2.4.11 1-Ethyl-2,4,6-triisopropylbenzene<sup>[S5]</sup>

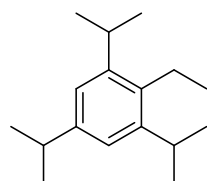

<sup>1</sup>H NMR (400 MHz, CD<sub>2</sub>Cl<sub>2</sub>):  $\delta$  = 7.10 (s, 2H); 2.95 (sept, <sup>3</sup>J<sub>HH</sub> = 7 Hz, 1H); 2.79 (sept, <sup>3</sup>J<sub>HH</sub> = 7 Hz, 2H); 7.12 (m, 2H); 1.32 (d, <sup>3</sup>J<sub>HH</sub> = 7 Hz, 6H); 1.30 (d, <sup>3</sup>J<sub>HH</sub> = 7 Hz, 6H); <sup>13</sup>C NMR (126 MHz, CD<sub>2</sub>Cl<sub>2</sub>):  $\delta$  = 150.5; 144.1; 122.0; 35.4; 32.0; 25.0 (br); 24.7

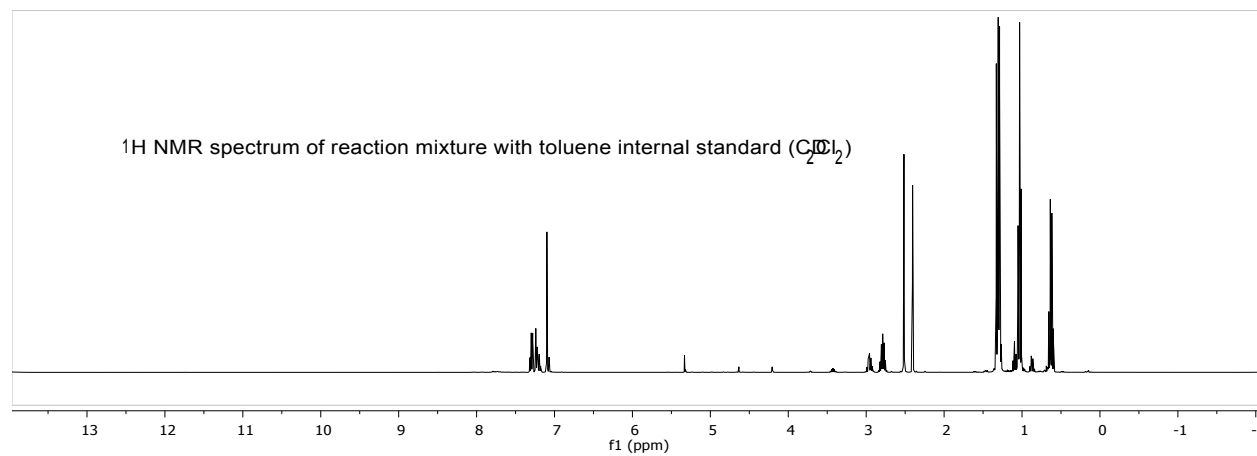

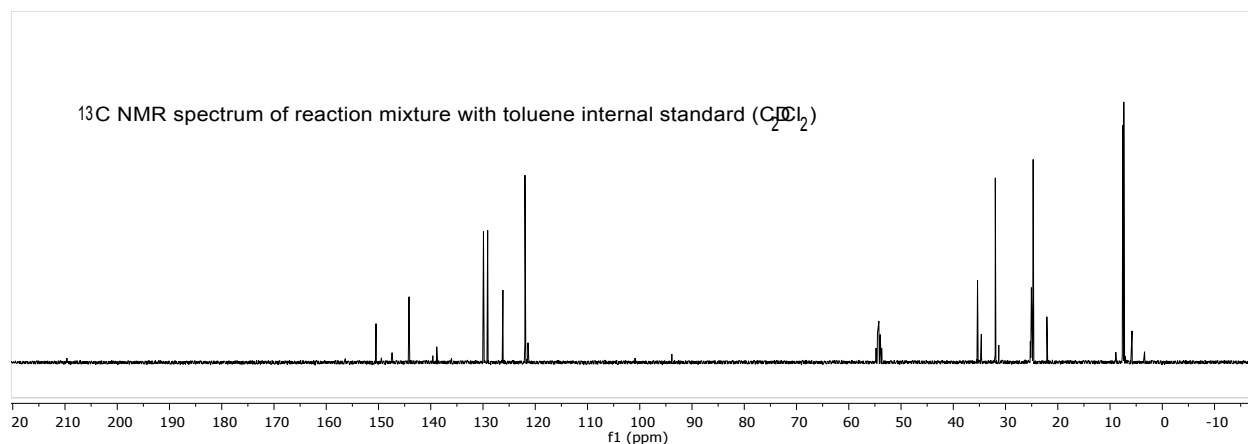

## 2.5 Hydrosilylation of 2,2,2-trifluoroacetophenone

### Triethyl(2,2,2-trifluoro-1-phenylethoxy)silane<sup>[S4]</sup>

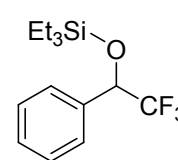
<sup>1</sup>H NMR (400 MHz, CD<sub>2</sub>Cl<sub>2</sub>):  $\delta$  = 7.53 (m, 2H); 7.44 (m, 3H); 5.04 (q, <sup>3</sup>J<sub>HF</sub> = 7 Hz, 1H); 0.98 (t, <sup>3</sup>J<sub>HH</sub> = 8 Hz, 9H); 0.63 (q, <sup>3</sup>J<sub>HH</sub> = 8 Hz, 6H); <sup>13</sup>C NMR (126 MHz, CD<sub>2</sub>Cl<sub>2</sub>):  $\delta$  = 136.7; 129.6; 128.8; 128.1; 124.9 (q, <sup>1</sup>J<sub>CF</sub> = 282 Hz); 73.9 (q, <sup>2</sup>J<sub>CF</sub> = 32 Hz); 6.7, 4.9; <sup>19</sup>F NMR (564 MHz, CD<sub>2</sub>Cl<sub>2</sub>):  $\delta$  = -78.8 (d, <sup>3</sup>J<sub>HF</sub> = 7 Hz);. **DART MS:** m/z: 308.16629 (calcd. for M+NH<sub>4</sub><sup>+</sup>: 308.165751).

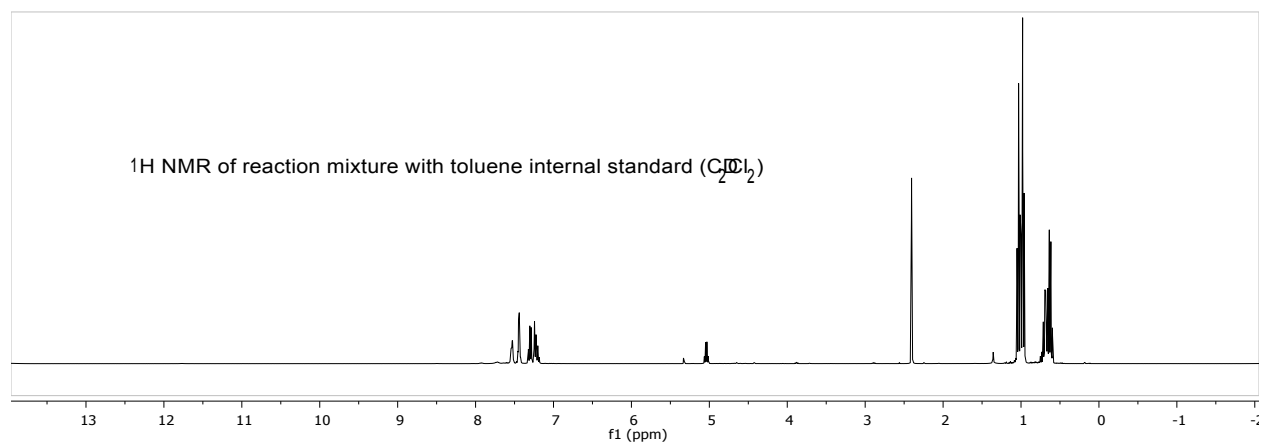

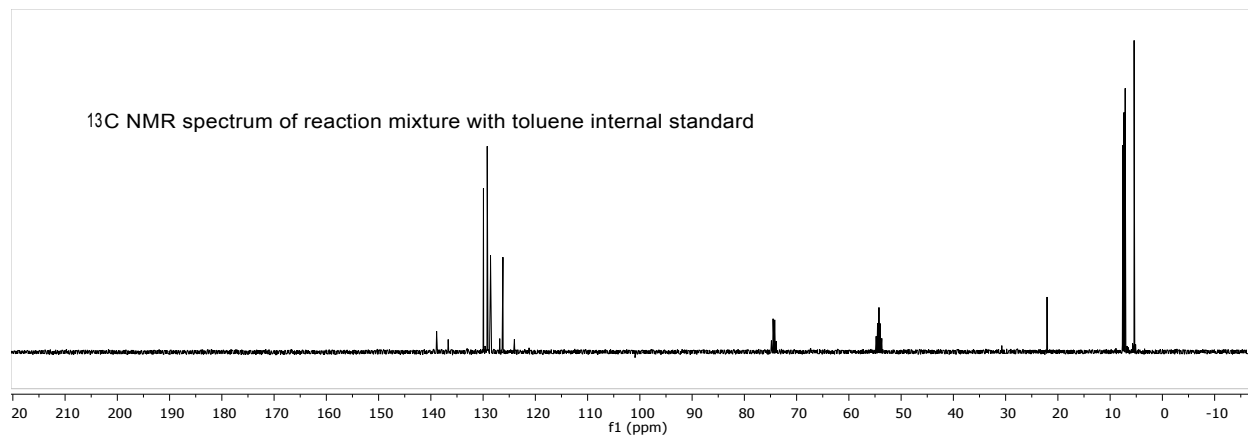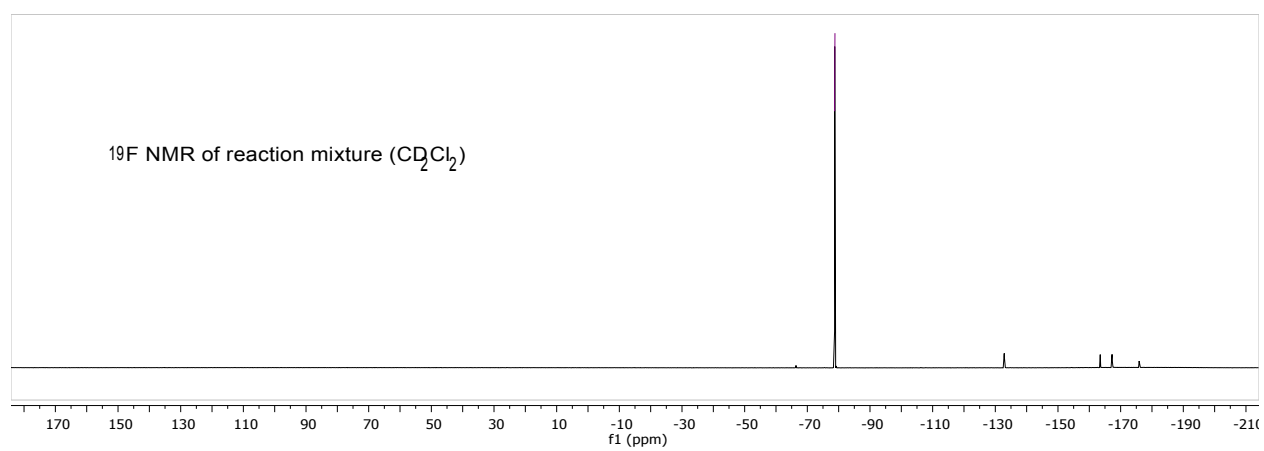

## REFERENCES

- [S1] G. P. Sollott, H. E. Mertwoy, S. Portnoy and J. L. Snead, *Journal of Organic Chemistry*, 1963, **28**, 1090-1092. G. Marr and T. Hunt, *Journal of the Chemical Society C: Organic*, 1969, 1070-1072.
- [S2] C. H. Honeyman, D. A. Foucher, F. Y. Dahmen, R. Rulken, A. J. Lough and I. Manners, *Organometallics*, 1995, **14**, 5503-5512.
- [S3] M.H. Holthausen, R.R. Hiranandani and D.W. Stephan *Chem. Sci.*, 2015, **6**, 2016-2021.
- [S4] M. Mehta, M.H. Holthausen, I. Mallov, M. Perez, Z.-W. Qu, S. Grimme and D.W. Stephan *Angew. Chem.*, 2015, **84**, 8250-8254.
- [S5] F.A. Bottino, P. Finochiaro, E. Libertini, A. Reale, and A. Recca *J. Chem. Soc Perkins Transaction. II: Physical. Organic Chemistry*, 1982, **1**, 77-81.
